# Supplementary material
Source: publisher figshare collection journal article supplement (https://gsapubs.figshare.com/ndownloader/files/35908436)
Supplement: Supplementary file 1 [file 35908436]

## Sheet: This study
Estimates of equilibration temperatures (°C) and oxygen fugacity for spinel peridotite xenoliths from Jiaohe.
Sample	TBK*	TBKN	TW77	TTA98	TWS	TNT	Mg#Ol	Cr#Sp	Fe3+/ΣFeSp	ΔlogƒO2 (B)	ΔlogƒO2 (W)
	Ca in Opx	Cpx-Opx	Cpx-Opx	Cpx-Opx	Cr-Al in Opx	enstatite in Cpx				[FMQ]	[FMQ]
Lherzolite
17DSH01	807.544	937.142	877.476	879.114	923.11	872.265	89.81	13.93	0.0684654	-2.19747	-1.69973
17DSH02	872.614	1051.55	926.156	968.879	920.854	964.607	88.78	7.91	0.0904324	-1.98516	-1.70411
17DSH03	924.784	1102.71	1023.11	1060.22	942.344	1061.92	89.39	9.99	0.187226	-0.90453	-0.633199
17DSH04	975.103	926.956	861.731	863.449	899.527	847.138	89.51	9.69	0.107443	-1.66649	-1.27735
17DSH05	792.995	895.914	846.672	826.763	902.16	813.159	89.91	12.08	0.0933377	-1.84129	-1.33005
17DSH06	988.381	865.892	835.229	840.978	901.223	823.941	89.55	11.71	0.0620964	-2.47263	-2.21226
17DSH07	874.418	971.036	917.27	924.508	931.22	912.871	89.47	11.56	0.106685	-1.61513	-1.18017
17DSH08	878.782	1013.57	966.967	980.708	918.577	968.293	89.31	9.49	0.0615743	-2.66809	-2.18688
17DSH09	912.874	973.083	923.751	958.912	932.073	952.895	89.85	15.33	0.0898532	-2.0119	-1.72914
17DSH10	856.121	1021.95	928.325	950.828	889.965	945.455	89.4	8.82	0.127205	-1.19731	-0.717077
17DSH11	856.426	929.342	878.474	905.031	923.702	898.597	89.64	12.37	0.100278	-1.6251	-1.1326
17DSH12	840.559	836.19	866.898	811.427	939.22	789.883	89.7	12.77	0.0430304	-3.01613	-2.53244
17DSH13	840.355	790.675	840.508	774.955	912.49	755.704	90.28	15.02	0.0952514	-1.55468	-0.970186
17DSH14	876.58	953.106	905.923	878.127	907.742	865.113	89.22	8.48	0.0935113	-1.81348	-1.40644
17DSH15	867.695	893.393	880.666	839.344	926.334	815.694	89.18	10.34	0.106242	-1.61429	-1.19064
17DSH16	830.376	877.419	868.454	813.769	953.801	788.727	89.38	12.09	0.0598472	-2.50946	-2.08859
Harzburgite
17DSH17	911.234	1127.53	1051.13	1051.77	919.838	1075.29	89.98	54.28	0.0964615	-1.48054	-1.26289
17DSH18	929.842	1033.46	972.121	969.841	916.747	983.65	89.52	56.49	0.134235	-1.21259	-1.10179
17DSH19	926.361	1106.29	1061.49	1053.71	911.097	1076.63	90.8	50.8	0.147381	-0.993902	-0.691089
17DSH20	909.421	943.895	935.749	921.418	958.458	927.388	91.17	49.73	0.116239	-1.29417	-0.947619
Ol, olivine; Opx, orthopyroxene, Cpx, clinopyroxene; Sp, spinel.
Equilibration temperatures (T) were estimated using the Ca-in-Opx method of Brey & Köhler (1990) corrected by Nimis & Grütter (2010) (i.e. TBK*), two pyroxene (Cpx-Opx) thermometers (i.e. TBKN: Brey & Köhler, 1990; TW77: Wells, 1977; TTA98: Taylor, 1998), the Al-in-Opx method of Witt-Eickschen & Seck (1991) (i.e. TWS) and enstatite in Cpx thermometer (i.e. TNT: Nimis & Taylor, 2000), respectively.
Mg#, 100×Mg/(Mg+Fetotal) molar; Cr#, 100×Cr/(Al+Cr) molar; Fe3+/ΣFeSp: Fe3+ and Fe2+ in spinel were calculated from EPMA data based on perfect crystal stoichiometry using the method of Droop (1987).
ΔlogƒO2 (B): Oxygen fugacity calculated using the oxygen barometer of Ballhaus et al. (1991, 1994).
ΔlogƒO2 (W): Oxygen fugacity calculated using the oxygen barometer of Wood (1990).
FMQ, relative to the fayalite–magnetite–quartz buffer. Pressure is assumed as 1.5 GPa in both temperature and ƒO2 calculation.
References
Ballhaus, C., Berry, R.F. & Green, D.H. (1991). High pressure experimental calibration of the olivine–orthopyroxene–spinel oxygen geobarometer: implications for the oxidation state of the upper mantle. Contributions to Mineralogy and Petrology 107, 27-40.
Ballhaus, C., Berry, R.F. & Green, D.H. (1994). High pressure experimental calibration of the olivine–orthopyroxene–spinel oxygen geobarometer: implications for the oxidation state of the upper mantle—Erratum. Contributions to Mineralogy and Petrology 118, 109.
Brey, G.P. & Köhler, T. (1990). Geothermobarometry in four-phase lherzolites II. New thermobarometers, and practical assessment of existing thermobarometers. Journal of Petrology 31, 1353-1378.
Droop, G.T.R. (1987). A general equation for estimating Fe3+ concentrations in ferromagnesian silicates and oxides from microprobe analyses, using stoichiometric criteria. Mineralogical magazine 51, 431-435.
Nimis, P. & Taylor, W.R. (2000). Single clinopyroxene thermobarometry for garnet peridotites. Part I. Calibration and testing of a Cr-in-Cpx barometer and an enstatite-in-Cpx thermometer. Contributions to Mineralogy and Petrology 139, 541-554.
Nimis, P. & Grütter, H. (2010). Internally consistent geothermometers for garnet peridotites and pyroxenites. Contributions to Mineralogy and Petrology 159, 411-427.
Taylor, W.R. (1998). An experimental test of some geothermometer and geobaro-meter formulations for upper mantle peridotites with application to the ther-mobarometry of fertile lherzolite and garnet websterite. Neues Jahrbuch für Mineralogie-Abhandlungen, 381-408.
Wells, P.R. (1977). Pyroxene thermometry in simple and complex systems. Contributions to mineralogy and Petrology 62, 129-139.
Witt-Eickschen, G. Seck, H.A. (1991). Solubility of Ca and Al in orthopyroxene from spinel peridotite: an improved version of an empirical geothermometer. Contributions to Mineralogy and Petrology 106, 431-439.
Wood, B.J. (1990). An experimental test of the spinel peridotite oxygen barometer. Journal of Geophysical Research: Solid Earth 95, 15845-15851.

## Sheet: Ref. NEC+NCC
Sample	Locality	Reference	TBK*	TBKN	TW77	TTA98	TWS	TNT	Mg#Ol	Cr#Sp	Fe3+/ΣFeSp	ΔlogƒO2 (B)	ΔlogƒO2 (W)
			Ca in Opx	Cpx-Opx	Cpx-Opx	Cpx-Opx	Cr-Al in Opx	enstatite in Cpx				[FMQ]	[FMQ]
northwestern NEC
KL3-10	Keluo	Zhang et al. (2011)	935.89	763.157	842.152	742.665	929.75	720.074	91.76	24.22	0.24767	0.533195	1.08658
KL3-24	Keluo	Zhang et al. (2011)	815.611	789.924	861.33	756.55	935.43	742.098	91.72	34.15	0.289139	0.70893	1.21107
KL3-26	Keluo	Zhang et al. (2011)	812.738	695.657	814.558	673.638	950.732	641.321	90.71	15.42	0.278449	0.428463	1.05337
KL3-27-1	Keluo	Zhang et al. (2011)	717.039	491.915	757.806	469.522	961.862	405.636	90.74	25.01	0.18259	0.599145	0.879776
KL3-27-2	Keluo	Zhang et al. (2011)	577.073	1143.93	1083.66	1027.49	738.472	1075.05	88.49	61.38	0.436799	2.44988	1.72477
KL3-28	Keluo	Zhang et al. (2011)	789.529	773.975	859.125	755.752	944.585	723.758	90.19
KL3-30	Keluo	Zhang et al. (2011)	875.075	721.465	826.503	696.828	884.936	676.69	90.8	49.24	0.307872	0.984202	1.24669
KL3-31	Keluo	Zhang et al. (2011)	933.288	758.993	830.301	733.005	930.16	708.206	90.81	15.66	0.310742	0.585937	1.13867
KL3-38	Keluo	Zhang et al. (2011)	831.691	725.249	832.54	703.891	926.703	674.119	90.56	20.46	0.308026	0.899601	1.3829
KL3-40	Keluo	Zhang et al. (2011)	826.45	1218.11	1200.32	1145.14	879.919	1195.38	91.43	57.34	0.502086	2.03049	2.09947
KL3-41	Keluo	Zhang et al. (2011)	814.826	792.559	858.883	776.544	905.878	755.679	91.02	13.78	0.265295	0.235081	0.956205
KL3-49	Keluo	Zhang et al. (2011)	840.417	732.099	835.491	712.103	939.491	688.357	91.84	32.16	0.29053	0.892844	1.38673
KL3-53	Keluo	Zhang et al. (2011)	886.905	768.079	862.819	762.565	921.257	745.721	91.16	39.57	0.330119	1.2845	1.63237
KL3-56	Keluo	Zhang et al. (2011)	873.472	652.713	777.643	628.777	906.021	599.837	90.2	11.64	0.274538	0.334308	0.94914
08KL-01	Keluo	Zhang et al. (2011)	777.902	687.675	786.241	661.56	899.234	637.343	89.49	20.6	0.18978	-0.081296	0.223867
08KL-02	Keluo	Zhang et al. (2011)	1005.74	1086.73	1094.69	1045.64	913.584	1064.32	90.84	74.63	0.260727	0.455355	0.665622
08KL-03	Keluo	Zhang et al. (2011)	1066.67	743.082	815.533	708.224	944.028	669.849	88.97
08KL-04	Keluo	Zhang et al. (2011)	841.487	526.013	738.904	519.523	889.786	482.857	89.28	10.06	0.111303	-1.08808	-0.625455
08KL-05	Keluo	Zhang et al. (2011)	792.464	837.23	898.576	799.493	918.201	781.421	89.09	21.4	0.202537	-0.159582	0.0507485
08KL-07	Keluo	Zhang et al. (2011)							90.65	41.7
08KL-09	Keluo	Zhang et al. (2011)	733.308	921.093	959.919	886.73	910.433	872.354	88.09	8.15	0.184503	0.0253734	0.469262
08KL-10	Keluo	Zhang et al. (2011)	851.63	634.533	811.186	609.89	942.739	570.2	88.67	10.58	0.128074	-0.965175	-0.611787
08KL-11	Keluo	Zhang et al. (2011)	899.799	671.428	795.753	626.72	912.396	605.148	90.69	53.63	0.257366	0.882669	0.893551
08KL-12	Keluo	Zhang et al. (2011)	700.697	828.392	894.229	801.884	893.941	791.89	89.43	19.99	0.131594	-0.703728	-0.279659
08KL-13	Keluo	Zhang et al. (2011)	801.404	848.996	919.848	814.942	884.954	809.753	90.29	47.74	0.284982	1.02193	1.11437
09NMB33	Nuomin	Hao et al. (2016)	1016.92				970.175		89.89	47.11	0.287852	-0.00663645	0.0620186
09NMB36	Nuomin	Hao et al. (2016)	986.469				995.934		90.44	32.61	0.2075	-0.183515	-0.0827946
09NMB37	Nuomin	Hao et al. (2016)	992.056	1042.97	1039.57	996.348	995.184	999.051	90.56	51.28	0.300337	-0.00757398	0.146339
09NMB38	Nuomin	Hao et al. (2016)	1034.82				946.541		91.57	63.36	0.316656	-0.254521	0.235186
09NMB40	Nuomin	Hao et al. (2016)	1026.18				1032.04		90.65	49.74	0.258111	-0.101694	0.191155
09NMB41	Nuomin	Hao et al. (2016)	978.723	1056.69	1065.18	1031.87	1027.5	1029.61	91.66	33.61	0.301673	-0.0613581	0.582281
09NMB42	Nuomin	Hao et al. (2016)	1017.62				961.719		91.28	60.22	0.214513	-0.0706374	0.0896623
09NMB49	Nuomin	Hao et al. (2016)	991.41	1068.87	1058.65	1025.27	1014.16	1022.1	90.53	28.68	0.357791	0.138111	0.484944
NM2-01	Nuomin	Zhang et al. (2019)	1037.72	1046.95	1063.79	1037.5	1002.99	1038.87	90.76
NM2-02	Nuomin	Zhang et al. (2019)	999.27	1056.51	1062.3	1047.12	1011.23	1049.42	90.92	38.33	0.474887	0.93292	1.15435
NM2-04	Nuomin	Zhang et al. (2019)	1049.2	1114.83	1090.89	1058.9	1074.77	1056.74	91.21	36.06	0.315368	-0.102454	0.337008
NM2-07	Nuomin	Zhang et al. (2019)	1034.33	1067.2	1054.8	1003.53	1068.1	992.138	89.01	38.5	0.358439	-1.04899	-0.882393
NM2-20	Nuomin	Zhang et al. (2019)	841.059	796.693	826.101	727.482	939.951	696.918	90.04	10.36	0.116446	-1.41701	-0.768873
NM2-23	Nuomin	Zhang et al. (2019)	1040.06	1085.49	1077.45	1055.57	1035.45	1059.21	91.32	41.9	0.343311	0.344712	0.614656
NM2-24	Nuomin	Zhang et al. (2019)	1026.2	1085.27	1065.63	1051.97	1022.04	1055.42	92.14
NM2-27	Nuomin	Zhang et al. (2019)	987.649	1215.28	1218.94	1178.08	1005.98	1197.47	89.08	31.46	0.214149	-0.200531	-0.27587
NM2-29	Nuomin	Zhang et al. (2019)	1030.14	1106.18	1080.88	1058.59	1052.95	1055.02	90.22	37.39	0.317469	0.19269	0.374216
NM2-34	Nuomin	Zhang et al. (2019)	1049.59	1101.02	1091.46	1073.26	1059.73	1077.04	91.78
NM2-37	Nuomin	Zhang et al. (2019)	1015.79	1087.25	1060.74	1042.33	1017.46	1039.75	89.86
NM2-39	Nuomin	Zhang et al. (2019)	775.176	767.098	831.03	701.232	933.225	671.855	89.71	11.37	0.0742998	-1.98674	-1.50978
NM2-48	Nuomin	Zhang et al. (2019)	1036.75	1101.75	1080.04	1062.86	1049.08	1059.96	90.98	34.62	0.385521	0.500394	0.734727
NM2-50	Nuomin	Zhang et al. (2019)	1017.16	1100.32	1072.56	1064.14	1023.05	1065.32	92.46	32.1	0.315039	0.10355	0.668251
NM2-51	Nuomin	Zhang et al. (2019)	1007.69	1089	1073.72	1053.19	1038.48	1051.94	91.18	32.98	0.397689	0.391963	0.844231
NM2-55	Nuomin	Zhang et al. (2019)	880.26	923.204	930.072	868.898	925.854	855.263	90.28	14.1	0.226131	-0.213978	0.296095
NM2-56	Nuomin	Zhang et al. (2019)	1062.42	1098.11	1104.71	1092.05	1043.4	1097.88	91.29
BLS01A	Nuomin	Tian et al. (2020)							90.9541
BLS02A	Nuomin	Tian et al. (2020)							91.6497
BLS02B	Nuomin	Tian et al. (2020)							90.6155
BLS03	Nuomin	Tian et al. (2020)	982.995				1005.51		90.5141
BLS06B	Nuomin	Tian et al. (2020)	1032.52				1035.23		90.4423
BLS07	Nuomin	Tian et al. (2020)							90.4521
BLS09	Nuomin	Tian et al. (2020)	1000.15	1063.85	1063.89	1027.86	1022.28	1028.06	90.3352
BLS10	Nuomin	Tian et al. (2020)	967.214	1080.68	1056.85	1038.95	1005.92	1037.75	90.9678	55.6444	0.336433	0.46449	0.902623
BLS12A	Nuomin	Tian et al. (2020)							90.5892
BLS16	Nuomin	Tian et al. (2020)							91.1469
BLS18	Nuomin	Tian et al. (2020)							90.9953
BLS19	Nuomin	Tian et al. (2020)	1025.28	1078.88	1041.63	1049.34	1037.39	1048.54	90.3807
BLS20	Nuomin	Tian et al. (2020)							90.9301
BLS21	Nuomin	Tian et al. (2020)	968.604	1198.51	1152.19	1124	981.348	1143.17	89.4983	52.9552	0.316387	0.414765	0.513513
BLS24	Nuomin	Tian et al. (2020)							91.3435
BLS25	Nuomin	Tian et al. (2020)							90.5382
BLS27	Nuomin	Tian et al. (2020)	1008.04				1030.99		88.968	45.4462	0.3403	0.666374	0.705161
BLS29	Nuomin	Tian et al. (2020)	1020.49	1164.08	1081.94	1082.4	1068.85	1089.48	90.0541
BLS30	Nuomin	Tian et al. (2020)	1024.72				991.256		89.674	38.9186	0.274104	0.210598	0.317317
BLS31	Nuomin	Tian et al. (2020)	1000.24				994.021		87.4523
BLS33	Nuomin	Tian et al. (2020)							89.3264
BLS34	Nuomin	Tian et al. (2020)	1050.76	1080.56	1076.4	1054.08	1045.13	1059.33	91.4289	34.7028	0.27018	0.181276	0.475893
BLS35A	Nuomin	Tian et al. (2020)	987.539				973.567		90.5199
BLS38A	Nuomin	Tian et al. (2020)	1012.74	1108.17	1087.19	1074.25	1031.16	1079.87	90.2973	48.0823	0.342892	0.52786	0.689861
BLS39A	Nuomin	Tian et al. (2020)							91.7432
BLS40	Nuomin	Tian et al. (2020)	1003.41				974.46		88.9106
NMH01	Nuomin	Tian et al. (2020)	1015.64				1019.46		89.2849
NMH03	Nuomin	Tian et al. (2020)	1006.69	1079.74	1037.54	1008.33	958.303	1007.17	89.6268
NMH04	Nuomin	Tian et al. (2020)	1018.51	1072.55	1038.55	1008.29	982.633	1007.39	89.9847
NMH06	Nuomin	Tian et al. (2020)	1034.96	1116.11	1070.9	1077.64	1039.74	1085.22	89.6627
NMH09	Nuomin	Tian et al. (2020)	967.044				988.779		89.2822
XSFS01	Nuomin	Tian et al. (2020)							91.5921
XSFS06	Nuomin	Tian et al. (2020)							91.7002
XSFS07	Nuomin	Tian et al. (2020)	904.985				954.356		90.9115
CH01-01	Halaha	Zhang (2011)	1231.12	1219.62	1223.48	1217.51	1247.24	1214.6	90.26	18.43	0.255974	1.09433	0.876891
CH01-02	Halaha	Zhang (2011)	1122.54	1172.83	1131.61	1118.89	1061.44	1109.22	87	54.1	0.410832	2.42527	1.52026
CH01-04	Halaha	Zhang (2011)	1053.79	1086.32	1063.5	989.532	980.364	1009.05	90.78	79.96	0.287308	0.488778	0.514265
CH01-05	Halaha	Zhang (2011)	1091	1117.53	1102.42	1080.02	1055.46	1074.76	89.12
CH01-07	Halaha	Zhang (2011)	824.917	687.542	788.608	635.959	976.246	596.854	89.57	35.11	0.177653	-0.268806	-0.506094
CH01-08	Halaha	Zhang (2011)	1214.42	1227.25	1224.89	1207.96	1258.4	1210.18	90.09	41.46	0.259182	-0.190985	-0.234197
CH01-09	Halaha	Zhang (2011)	816.476	772.678	815.9	726.427	920.266	703.663	89.62	30.5	0.179101	-0.463893	-0.351291
CH01-10	Halaha	Zhang (2011)	1226.68	1254.72	1255.85	1241.09	1236.12	1242.99	90.05
CH01-11	Halaha	Zhang (2011)	1010.85	1133.06	1121.25	1086.03	1236.05	1091.72	90.04	55.67	0.206122	-0.660632	-0.637406
CH02-01	Halaha	Zhang (2011)	1088.11	1128.74	1126.01	1074.79	1122.74	1070.51	90.52	50.65	0.249256	0.179051	0.286299
CH02-04	Halaha	Zhang (2011)	1211.48	1250.05	1244.72	1217.58	1214.53	1227.09	90.77	44.12	0.367839	1.22217	1.42151
CH02-05	Halaha	Zhang (2011)	1213.28	1252.39	1257.16	1228.72	1208.23	1230.55	90.6
03CH-01	Halaha	Zhang (2011)	1224.67	1278.37	1267.91	1252.3	1194.65	1256.4	90.47
03CH-02	Halaha	Zhang (2011)	1223.62	1348.86	1426.39	1321.33	1136.25	1352.5	89.73
03CH-03	Halaha	Zhang (2011)	1210.19	1267.95	1252	1272.98	1101.25	1286.25	89.92
03CH-04	Halaha	Zhang (2011)	1244.86	1272.61	1267.25	1248.53	1200.46	1254.21	90.73
03CH-05	Halaha	Zhang (2011)	818.598	1029.74	996.344	952.978	947.324	949.849	90.73	15.55	0.00714374	-6.01211	-5.49089
03CH-06	Halaha	Zhang (2011)	1225.11	1291.07	1284.65	1249.78	1167.53	1255.4	89.83	11.88	0.07804	-2.08646	-2.17746
03CH-07	Halaha	Zhang (2011)	1191.95	1185.08	1188.27	1155.97	1219.71	1159.17	90.76
03CH-08	Halaha	Zhang (2011)	1189.82	1208.18	1186.81	1180.35	1226.02	1180.26	90.78	38.81	0.200862	-0.417162	-0.264878
03CH-10	Halaha	Zhang (2011)	1068.57	1066.76	1060.49	1022.26	1059.91	1024.32	92.07	50.08	0.146107	-0.896327	-0.668661
03CH-13	Halaha	Zhang (2011)	1169.94	1219.46	1208.8	1172.42	1203.99	1182.91	91.17	49.04	0.241007	0.00698674	0.173904
03CH-15	Halaha	Zhang (2011)	1250.94	1287.01	1304.32	1254.54	1174.71	1263.95	89.8
GW04226	Halaha	Zhang (2011)	818.496	781.679	842.509	734.441	900.687	706.069	89.32	9.32	0.121839	-1.31161	-0.795697
GW04227	Halaha	Zhang (2011)	1182.74	1244.62	1228.22	1199.07	1122.27	1190.31	90
GW04229	Halaha	Zhang (2011)	1172.48	1249.68	1201.74	1201.94	1115.65	1195.46	89.75
GW04240	Halaha	Zhang (2011)	1301.73	1181.44	1249.91	1278.23	1878.93	1192.49	90.64	38.09	0.262389	0.0359155	0.257189
07DLH04	Halaha	Zhao & Fan (2011)	955.643	1127.5	1046.72	993.668	925.598	1020.03	91.94	83.3	0.400299	1.3016	1.57367
07DLH05	Halaha	Zhao & Fan (2011)	1171.44	1178.11	1154.36	1142.15	1217.03	1144.21	91.16	46.87	0.312963	0.303791	0.489525
07HXD01	Halaha	Zhao & Fan (2011)	1258.66	1210.83	1248.29	1187.67	1225.09	1198.71	91.07	55.26	0.371951	0.692582	0.891753
07HXD03	Halaha	Zhao & Fan (2011)	1151.22	1203.98	1186.11	1149.07	1241.2	1143.04	90.56
07HXD05	Halaha	Zhao & Fan (2011)	1091.56	1413.88	810.085	1069.66	969.501	1036.76	91.47	82.45	0.306327	0.685103	0.943203
07TFL01	Halaha	Zhao & Fan (2011)	1124.31				1097.77		91.62	83.47	0.320498	1.24402	3.09498
07TFL03	Halaha	Zhao & Fan (2011)	842.626	1101.92	1107.97	1029.47	832.226	1063.76	91.94	62.86	0.218284	0.384526	0.763874
08TFL02	Halaha	Zhao & Fan (2011)	968.355	738.89	809.755	679.133	970.9	649.587	91.13	31.91	0.105688	-1.11528	-0.774043
08TFL07	Halaha	Zhao & Fan (2011)	956.111	633.713	760.853	620.199	882.165	592.68	91.35	57.25	0.0392995	-2.75722	-2.58624
07WNP01	Halaha	Zhao & Fan (2011)	1031.17	1020.96	1027.83	965.038	1070.88	932.731	90.28	16.77	0.172636	-1.13582	-0.865107
07WNP07	Halaha	Zhao & Fan (2011)	1201.72	1200.88	1196.48	1196.3	1215.47	1199.36	89.94	38.08	0.294759	-0.0196778	0.0823004
07TFL04	Halaha	Zhao & Fan (2011)	809.833	405.51	705.142	376.176	900.047	341.716	89.77	9.9	0.140881	-1.03318	-0.399279
07TFL06	Halaha	Zhao & Fan (2011)	871.867	428.64	710.555	409.433	965.119	372.249	90.05	10.92	0.321807	0.593883	0.945599
07DCH01	Halaha	Zhao & Fan (2011)	798.89	633.373	773.365	571.957	857.141	540.209	90.26	10.92	0.156603	-0.821066	-0.193375
07DCH02	Halaha	Zhao & Fan (2011)	795.664	669.344	794.092	615.776	934.718	582.112	90.14	11.15	0.119241	-1.22865	-0.640197
08WNP08	Halaha	Zhao & Fan (2011)	1223.21	1218.36	1223.75	1214.27	1203.08	1216.94	90.05
08TFL06	Halaha	Zhao & Fan (2011)	833.847	1064.79	1039.26	999.304	936.088	991.498	89.33	9.33	0.125164	-1.02347	-0.559752
TFL-04	Halaha	Liu (2014)	796.388	857.07	862.725	785.66	972.196	757.69	91.1	19.95	0.208358	-0.318881	0.155358
TFL-07	Halaha	Liu (2014)	922.143	954.841	954.196	932.25	957.292	934.811	92.09	36.23	0.147735	-0.518979	-0.0637297
0098-10-1	Halaha	Liu (2014)	1196.41	1275.21	1252.95	1220.79	1099.02	1231.03	91.01	48.45	0.290432	1.19681	1.244
0098-10	Halaha	Liu (2014)	817.199	907.198	914.106	846.586	898.013	839.514	91.3	33.46	0.310574	0.375372	0.902853
0098-13	Halaha	Liu (2014)	1219.78	1231.25	1331.48	1236.67	1252.56	1253.68	91.44	45.98	0.584496	1.81142	2.81243
0098-19	Halaha	Liu (2014)	908.324	913.609	908.307	864.341	945.107	856.248	91.35	31.96	0.233497	-0.153125	0.424333
TXT-04	Halaha	Liu (2014)	1057.84	1149.49	1118.4	1086.95	1002.3	1091.19	91.01	69.93	0.289023	2.48738	2.16246
TFL-08	Halaha	Liu (2014)	828.097	1044.77	969.295	962.985	919.286	965.978	90.38	27.83	0.274304	0.593293	1.00211
0098-06	Halaha	Liu (2014)	809.076	809.955	851.087	751.295	896.483	722.835	89.45	8.09	0.208014	-0.395602	0.243242
0098-15	Halaha	Liu (2014)	1041.54	926.41	882.906	873.828	916.51	848.546	89.05	8.77	0.512752	1.08716	1.3114
0098-17	Halaha	Liu (2014)	757.611	896.466	919.043	835.959	945.19	813.506	89.15	13.96	0.20651	-0.216439	0.365465
TXT-02	Halaha	Liu (2014)	1015.66	1204.16	1123.54	1121.61	1010.47	1136.83	90.83	33.71	0.479279	1.26301	1.49639
AS01	Halaha	Pan et al. (2015)	819.102	822.08	839.788	766.116	912.796	742.699	89.3	9.66	0.201844	-0.355717	0.102873
AS02	Halaha	Pan et al. (2015)	825.657	814.156	836.993	761.63	958.284	741.005	90.89	21.27	0.15788	-0.784237	-0.275322
AS03	Halaha	Pan et al. (2015)	1028.05	1133.53	1069.96	1063.35	986.131	1060.6	90.27
AS04	Halaha	Pan et al. (2015)	1071.92	1175.02	1133.88	1121.16	1079.81	1113.92	90.3	26.76	0.281926	0.281155	0.468485
AS05	Halaha	Pan et al. (2015)	1097.22	1174.63	1128.37	1112.75	1069.98	1104.33	90.32	27.84	0.275897	0.241008	0.389718
AS07	Halaha	Pan et al. (2015)	1257.46	1262.55	1268.67	1236.19	1177	1265.14	90.79	59.96	0.235426	0.576953	0.587292
DHG01	Halaha	Pan et al. (2015)	1018.92	1078.26	1038.93	1013.17	1019.86	1004.15	88.08	29.92	0.310923	0.667292	0.571018
DHG02	Halaha	Pan et al. (2015)	1032	1080.42	1047.75	1018.28	1022.97	1006.86	88.73	29.44	0.310864	0.762961	0.858247
DHG04	Halaha	Pan et al. (2015)	1174.59	1236.2	1194.46	1192.72	1117.49	1187.37	90.03
DHG09	Halaha	Pan et al. (2015)	916.473	935.861	940.009	913.354	958.599	909.564	90.74	43.57	0.232688	0.192171	0.364813
DHG11	Halaha	Pan et al. (2015)	1135.18				1069.17		91.13	71.33	0.291066	0.698977	0.818559
DHG12	Halaha	Pan et al. (2015)	1201.31	1239.69	1217.09	1212.47	1223.27	1220.32	90.81	42.48	0.297486	0.254079	0.427214
DHG13	Halaha	Pan et al. (2015)	1201.75	1232.65	1208.29	1204.85	1255.74	1210.48	90.8	42.11	0.275987	0.188504	0.327625
DHG05	Halaha	Pan et al. (2015)	1197.53	1221.59	1208.26	1205.61	1211.12	1213.14	90.98	49.96	0.263617	0.0665019	0.211278
DHG14	Halaha	Pan et al. (2015)	1243.33	1255.69	1262.37	1249.62	1250.03	1260.1	90.85	41.45	0.290872	0.0461881	0.229252
A2-2	Abaga	Zhang et al. (2012)	823.811	806.033	836.834	764.582	963.997	738.348	89.91	12.83	0.039582	-3.04519	-2.55261
A2-1	Abaga	Zhang et al. (2012)	949.724	986.845	1025.9	988.773	936.12	996.059	89.8	31.64	0.185161	-0.559808	-0.169033
A2-10	Abaga	Zhang et al. (2012)	822.786	1228.54	1190.23	1173.34	931.864	1200.32	89.78	11.74	0.127544	-1.03436	-0.526899
A2-11	Abaga	Zhang et al. (2012)	834.519	877.956	874.86	820.657	941.785	799.689	89.66	13.16	0.129839	-1.06953	-0.616409
ABG08	Abaga	Zhang et al. (2012)	1440.79	867.311	880.133	818.999	1016.09	751.064	89.61	12.83	0.578843	0.462548	0.598914
ABG05-1	Abaga	Zhang et al. (2012)	855.458	819.591	866.577	815.33	967.284	800.206	90.38	26.63	0.16965	-0.442441	0.0130234
ABG06-1	Abaga	Zhang et al. (2012)	870.707	830.451	868.62	821.34	967.408	801.359	90.28	18.8	0.105042	-1.27292	-0.710876
ABG07-1	Abaga	Zhang et al. (2012)	1092.48	1125.61	1106.73	1124.59	1074.63	1136.76	89.9	41.83	0.308438	0.53477	0.657401
XLHT1	Abaga	Pan et al. (2013)	1040.27	1138.65	1108.77	1074.54	1040.31	1080.63	90.3	43.07	0.315311	0.347394	0.452176
XLHT2a	Abaga	Pan et al. (2013)	1050.93	1093.77	1091.09	1059.69	1055.51	1057.87	90.57
XLHT2b	Abaga	Pan et al. (2013)	1054.64	1086.7	1058.07	1048.01	1033.61	1046.65	91.06
XLHT3	Abaga	Pan et al. (2013)	1020.31	1099.79	1058.6	1031.18	1058.27	1017.72	88.8
XLHT4	Abaga	Pan et al. (2013)	1039.2	1138.18	1087.92	1079.95	1031.17	1060.34	88.38	11.46	0.283579	0.127534	0.369286
XLHT9	Abaga	Pan et al. (2013)	1027.15	1119.93	1055.15	1023.94	1058.63	1023.38	90.14	47.63	0.251183	0.165632	0.279186
XLHT10	Abaga	Pan et al. (2013)	1045.48	1066.79	1053.65	1046.49	974.002	1059.42	90.92
XLHT11	Abaga	Pan et al. (2013)	1042.51	1056.16	1058.96	1040.37	1002.79	1050.61	90.9	51.71	0.280706	0.30164	0.569721
XLHT12	Abaga	Pan et al. (2013)	1042.27	1133.2	1082.67	1056.2	1058.44	1042.39	88.58
XLHT13	Abaga	Pan et al. (2013)	1039.18	1098.31	1050.82	1026.7	1029.11	1023.05	90.61
XLHT14	Abaga	Pan et al. (2013)	799.777	811.898	843.156	769.371	963.223	744.601	90.29	16.71	0.124112	-1.19938	-0.672326
XLHT15	Abaga	Pan et al. (2013)	1059.05	1118.4	1063.65	1055.19	1029.15	1058.02	90.5	43.77	0.2824	0.0998673	0.345835
XLHT17	Abaga	Pan et al. (2013)	823.757	831.824	857.978	774.913	960.27	745.343	89.97
XLHT18	Abaga	Pan et al. (2013)	774.596	900.737	913.421	851.306	918.164	841.735	89.89	16.28	0.207079	-0.259247	0.280647
XLHT19	Abaga	Pan et al. (2013)	904.097	1025.16	1005	974.285	1052.2	961.415	90.72	19.96	0.222778	-0.273674	0.20568
XLHT20	Abaga	Pan et al. (2013)	818.842	890.42	871.045	826.056	923.736	806.28	89.92	11.01	0.18526	-0.485662	0.080363
XLHT22	Abaga	Pan et al. (2013)	847.471	812.301	864.579	788.207	937.719	766.596	90.45	15.86	0.211442	-0.116897	0.395345
southeastern NEC
BLS-1	Shuangliao	Yu et al. (2009)	919.847	945.446	961.563	896.265	902.193	881.548	89.17	10.07	0.205121	-0.711781	-0.354272
BLS-2	Shuangliao	Yu et al. (2009)	936.453	978.36	986.168	904.209	930.691	906.235	91.09	50.37	0.214063	-0.424011	-0.164478
BLS-3	Shuangliao	Yu et al. (2009)	945.069	964.159	990.631	903.773	925.422	888.838	89.93	11.16	0.197127	-0.398619	-1.22721
BLS-5	Shuangliao	Yu et al. (2009)	1031.09	1079.64	1069.4	1023.45	976.676	1006.57	89.39	9.79	0.151892	-1.21904	-0.880954
BLS-6	Shuangliao	Yu et al. (2009)	952.292	929.975	979.832	904.829	920.469	903.956	90.74	37.67	0.176151	-0.739625	-0.547127
NBS-1	Shuangliao	Yu et al. (2009)	811.155	821.574	903.274	772.013	854.26	759.096	89.95	10.73	0.157738	-0.994317	-0.410512
BBT-1	Shuangliao	Yu et al. (2009)	1077.25	1097.16	1100.32	1076.85	1021	1074.13	90.19	24.8	0.289716	0.00155687	0.338205
BBT-2	Shuangliao	Yu et al. (2009)	818.551	915.385	944.133	869.202	885.827	871.376	91.05	35.52	0.108614	-1.73261	-1.33611
BBT-4	Shuangliao	Yu et al. (2009)	860.329	839.727	896.236	801.417	892.292	794.62	90.91	38.77	0.123961	-1.46502	-1.09061
BBT-5	Shuangliao	Yu et al. (2009)	804.763	829.852	887.214	790.143	844.691	787.378	91.06	40.35	0.118276	-1.65467	-1.15171
BBT-6	Shuangliao	Yu et al. (2009)	1063.04	1089.83	1082.84	1044.3	1046.08	1045.41	90.83	37.25	0.252764	-0.178538	0.0302161
BBT-7	Shuangliao	Yu et al. (2009)	1048.93	1054.28	1066.76	1031.74	1007.54	1030.52	90.47	29.44	0.223013	-0.367957	-0.168195
BBT-8	Shuangliao	Yu et al. (2009)	1090.78	1142.47	1112.87	1089.59	1026.99	1075.2	89.75	12.89	0.259404	-0.194208	0.0812687
BBT-9	Shuangliao	Yu et al. (2009)	1067.72	1098.74	1087.46	1042.84	982.671	1059.51	91.15	57.76	0.294284	0.403425	0.559751
BBT-10	Shuangliao	Yu et al. (2009)	1067.31	1104.83	1094.23	1056.63	1079.61	1057.68	91.46	35.1	0.228974	-0.392469	-0.109661
BBT-11	Shuangliao	Yu et al. (2009)	1088.93	1086.19	1100	1061.11	1039.29	1058.65	90.28	30.78	0.323168	0.251903	0.430765
BBT1-5	Shuangliao	Hao et al. (2016)	1035.88	1114.74	1112.14	1059.28	1052.81	1048.93	91.35	32.55	0.212546	-0.382046	-0.000620444
BBT1-06	Shuangliao	Hao et al. (2016)	1028.25	1121.64	1122.53	1059.2	1060.12	1052.19	91.59	28.52	0.225506	-0.252951	0.179731
BBT2-4	Shuangliao	Hao et al. (2016)	1027.78	1079.77	1115.76	1034.11	1026.14	1031.03	92.34	32.35	0.229977	-0.0705632	0.676885
BBT2-14	Shuangliao	Hao et al. (2016)	1009.72	1056.87	1102.9	1015.41	1032.59	1012.25	90.45	43.78	0.197701	-0.387133	-0.163907
BL2-10	Shuangliao	Hao et al. (2016)	915.406	987.511	1031.5	932.181	953.47	915.894	90.1	12.56	0.120658	-1.5908	-1.10231
17SL1-1	Shuangliao	Guo et al. (2020)	916.067	964.446	959.405	926.256	930.232	913.224	90.3066	14.6175	0.363819	-0.00272522	0.488611
17SL1-2	Shuangliao	Guo et al. (2020)	1022.3	1049.7	1014.37	995.929	1003.73	975.282	90.0849	11.3827	0.370949	0.163272	0.543527
17SL1-7	Shuangliao	Guo et al. (2020)	975.495	984.939	972.28	919.64	964.561	915.028	90.9098	34.8228	0.302343	-0.128291	0.0790757
17SL1-8	Shuangliao	Guo et al. (2020)	1017.22	1020.9	1018.33	1009.33	971.714	1018.77	91.1129	44.6828	0.322986	0.211846	0.540112
17SL1-16	Shuangliao	Guo et al. (2020)	824.584	845.192	850.293	791.163	899.783	770.227	89.7499	9.62613	0.315398	0.0908865	0.688477
17SL1-18	Shuangliao	Guo et al. (2020)	840.499	905.347	892.611	851.227	895.191	834.382	89.9417	11.546	0.28948	-0.186929	0.312058
17SL1-20	Shuangliao	Guo et al. (2020)	946.346	946.02	946.19	924.868	915.864	918.547	89.8839	35.7646	0.235236	-0.558369	-0.426771
17SL1-23	Shuangliao	Guo et al. (2020)	920.732	964.988	961.664	954.086	954.195	946.795	90.6872	18.9088	0.310623	-0.241073	0.252675
17SL2-3	Shuangliao	Guo et al. (2020)	829.939	892.561	896.46	847.488	897.271	832.754	89.9176	11.4162	0.305942	-0.236758	0.239436
17SL2-6	Shuangliao	Guo et al. (2020)	824.029	890.42	868.339	825.673	886.285	811.206	89.5205	8.47648	0.289825	-0.247199	0.4074
17SL2-7	Shuangliao	Guo et al. (2020)	846.074	873.536	867.06	808.544	928.535	785.995	89.5469	9.37419	0.252341	-0.486715	0.0365221
17SL3-15	Shuangliao	Guo et al. (2020)	1037.07	981.091	1032.63	928.343	1080.99	902.041	91.6263	26.1682	0.10337	-1.66025	-1.3812
17SL3-16	Shuangliao	Guo et al. (2020)	1070.24	1114.55	1073.39	1052.53	1046.77	1063.62	91.5006	52.2914	0.352525	0.386816	0.435379
l-14	Yitong	Xu et al. (1993)	953.997	1028.31	998.761	968.061	925.725	957.363	89.29	12.84	0.113552	-1.76831	-1.4497
l-44	Yitong	Xu et al. (1993)	958.457	994.042	1007.58	929.476	969.572	908.534	89.89	13.21	0.00119234
2-07	Yitong	Xu et al. (1993)	851.673	957.436	942.856	908.103	897.222	896.454	89.41	11.15	0.147649	-1.0988	-0.671883
2-32	Yitong	Xu et al. (1993)	944.549	1004.65	1004.18	967.08	960.672	958.346	90.53	16.03	0.147579	-1.14031	-0.714182
3-07	Yitong	Xu et al. (1993)	930.514	922.816	965.931	901.087	896.841	903.739	90.72	46.32	0.223528	-0.0930845	0.13777
3-17	Yitong	Xu et al. (1993)	971.361	933.75	978.102	846.691	964.77	813.227	87.75	10.96	0.107744	-1.71767	-1.4451
l-48	Yitong	Xu et al. (1993)	997.38	896.641	923.386	906.271	935.217	886.199	79.61	21.66	0.135334	-1.29967	-1.58956
l-17	Yitong	Xu et al. (1993)	1016.06	966.017	990.266	927.844	947.943	888.771	79.23	2.64	0.151578	-1.00293	-1.15587
2-12	Yitong	Xu et al. (1993)	800.577	663.584	818.016	622.996	870.65	594.102	90.08	12.21	0.0930738	-1.69103	-1.00573
2-51	Yitong	Xu et al. (1993)	766.953	751.191	826.509	737.281	960.997	712.894	89.01	11.74	0.147257	-0.965974	-0.583694
2-31	Yitong	Xu et al. (1993)	806.566	770.932	844.916	732.002	781.395	727.094	89.55	15.64	0.140204	-1.02233	-0.546426
DX91-7	Yitong	Xu et al. (1993)	768.585	754.929	833.133	706.509	795.459	695.358	89.7	11.77	0.177999	-0.428691	0.172123
DX-06	Yitong	Zhou et al. (2010)	988.466	1077.03	1013.31	1041.39	968.437	1036.91	90.3	15.46	0.130101	-1.52301	-1.2082
DX-07	Yitong	Zhou et al. (2010)	987.659	1067.12	1007.01	1031.98	990.754	1027.59	90.94	18.5	0.16316	-1.12062	-0.77573
DX-08	Yitong	Zhou et al. (2010)	986.275	1095.43	1022.92	1041.61	994.642	1029.64	89.9	13.01	0.174071	-1.00825	-0.6881
DX-10	Yitong	Zhou et al. (2010)	937.629	1002.93	949.982	953.581	925.761	947.975	90.44	17.34	0.135264	-1.26455	-0.912145
DX-11	Yitong	Zhou et al. (2010)	902.559	1008.85	961.74	958.848	933.523	954.358	90.75	17.92	0.154491	-1.13409	-0.695072
08DX-01	Yitong	Zhou et al. (2010)	924.162	957.347	945.321	933.345	859.728	925.721	89.45	14.06	0.16439	-1.07103	-0.728034
08DX-02	Yitong	Zhou et al. (2010)	1008.67	1035.33	995.762	1003.53	924.868	997.659	89.75	20.72	0.205556	-0.759723	-0.453868
08DX-04	Yitong	Zhou et al. (2010)	992.024	1037.96	1007.2	1012.85	892.381	1004.01	89.36	12.33	0.16761	-1.11954	-0.575611
08DX-06	Yitong	Zhou et al. (2010)	907.084	977.306	951.232	950.329	877.838	946.511	89.18	14.66	0.170919	-0.973981	-0.619379
08DX-08	Yitong	Zhou et al. (2010)	975.385	1049.21	1013.45	1019.72	914.202	1013.35	89.44	13.24	0.182292	-0.915393	-0.566441
08DX-10	Yitong	Zhou et al. (2010)	946.902	1003.87	953.155	942.503	850.999	928.161	87.98	10.26	0.136992	-1.3376	-1.05893
08DX-11	Yitong	Zhou et al. (2010)	975.613	1010.92	995.149	981.905	962.393	967.021	89.59	13.63	0.190581	-0.753642	-0.405265
08DX-12	Yitong	Zhou et al. (2010)	910.742	933.095	941.626	874.891	897.762	863.505	88.93	11.81	0.181538	-0.885842	-0.458623
08DX-13	Yitong	Zhou et al. (2010)	909.618	903.354	915.418	862.722	902.535	843.523	88.77	11.01	0.167572	-1.01516	-0.660459
08DX-14	Yitong	Zhou et al. (2010)	941.378	982.833	969.581	930.026	918.861	913.753	87.88	10.64	0.174645	-0.851314	-0.560059
08DX-15	Yitong	Zhou et al. (2010)	1012.62	1017.33	994.094	977.552	983.362	964.265	89.26	20.74	0.131986	-1.31638	-1.05948
DX-03	Yitong	Zhou et al. (2010)	902.236	989.932	967.326	935.407	907.305	928.926	88.51	14.07	0.185107	-0.605739	-0.601185
DX-09	Yitong	Zhou et al. (2010)	919.884	1010.25	958.051	967.137	894.095	964.779	89.9	12.84	0.135808	-1.41783	-1.11868
08DX-05	Yitong	Zhou et al. (2010)	987.783	1041.39	1019.97	1012.97	911.084	1005	89.42	13.45	0.189881	-0.871362	-0.406004
08DX-07	Yitong	Zhou et al. (2010)	910.106	970.721	941.805	931.157	859.275	920.846	89.19	10.6	0.186547	-0.817319	-0.424026
08DX-17	Yitong	Zhou et al. (2010)	979.581	1029.89	1003.4	1004.27	956.451	1000.6	89.68	21.51	0.218931	-0.629616	-0.358714
08DX-18	Yitong	Zhou et al. (2010)	1013.55	1019.83	1002.31	988.003	1001.47	977.108	89.42	20.05	0.143173	-1.27256	-1.01371
DX-04	Yitong	Zhou et al. (2010)	751.967	786.297	829.105	764.282	822.841	754.395	89.78	14.01	0.156463	-0.543298	-0.0359063
DX-05	Yitong	Zhou et al. (2010)	728.42	837.638	841.296	799.513	775.66	797.341	89.45	12.23	0.184312	-0.382243	0.133877
08DX-03	Yitong	Zhou et al. (2010)	979.143	998.956	991.659	966.525	905.848	956.553	84.39	14.58	0.272626	-0.139007	-0.147337
08DX-09	Yitong	Zhou et al. (2010)	1016.11	988.456	999.85	981.306	951.791	981.526	89.74	35.3	0.172543	-0.842682	-0.597598
DX-01	Yitong	Zhou et al. (2010)	961.146	1011.5	987.354	979.881	811.519	996.017	89.67	43.87	0.175544	-1.05176	-1.13745
DX-02	Yitong	Zhou et al. (2010)	690.898	728.058	781.584	721.928	765.154	718.617	91.79	38.12	0.255781	0.63188	1.32954
08DX-20	Yitong	Zhou et al. (2010)	824.142	1087.53	1057.57	1029.57	801.703	1054.92	90.89
08DX-16	Yitong	Zhou et al. (2010)							87.58	25.87
08DX-19	Yitong	Zhou et al. (2010)							88.34	25.29
YT-5	Yitong	Hao et al. (2016)	1009.96	1048.93	1068.09	1006.6	1035.09	993.406	90.99	21.71	0.173036	-0.89776	-0.614521
YT-25	Yitong	Hao et al. (2016)	863.263	870.06	947.291	829.4	905.203	820.446	90.21	33.03	0.108794	-1.56517	-1.3192
YT-26	Yitong	Hao et al. (2016)	934.028	925.372	998.786	897.206	930.11	894.346	90.67	42.6	0.146897	-0.949174	-0.632277
DSH00-2	Jiaohe	Zhou et al. (2007)	849.532	954	920	892	907	877	89.73	10.07	0.14154	-1.07929	-0.554354
DSH00-3	Jiaohe	Zhou et al. (2007)	913.754	980	938	927	926	912	89.29	9.45	0.117773	-1.59713	-1.1898
DSH00-4	Jiaohe	Zhou et al. (2007)	830.035	887	920	871	915	858	90.13	14.33	0.15937	-0.719952	-0.15848
DSH00-5	Jiaohe	Zhou et al. (2007)	939.286	801	847	760	894	729	90.13	14.22	0.0885011	-2.01481	-1.50691
DSH00-6	Jiaohe	Zhou et al. (2007)	859.229	927	908	853	904	832	89.48	9.92	0.089909	-2.04034	-1.60423
DSH00-7	Jiaohe	Zhou et al. (2007)	812.633	964	943	889	918	874	89.16	10.32	0.094732	-1.75147	-1.22113
DSH00-8	Jiaohe	Zhou et al. (2007)	767.027	879	927	838	930	822	90.06	14.44	0.0809069	-1.99217	-1.42421
DSH00-10	Jiaohe	Zhou et al. (2007)	820.095	851	902	806	986	784	91.35	21.63	0.071726	-2.19244	-1.67511
DSH00-11	Jiaohe	Zhou et al. (2007)	794.462	914	937	902	924	888	90.2	19.3	0.164139	-0.67243	-0.192549
DSH00-12	Jiaohe	Zhou et al. (2007)	829.007	975	956	925	931	908	90.02	10.62	0.0733983	-2.24863	-1.69225
YQS-1	Jiaohe	Yu et al. (2009)	817.081	735	858	730	868	714	90.23	16.4	0.187156	-0.341588	0.205375
YQS-2	Jiaohe	Yu et al. (2009)	837.723	800	859	760	814	758	91.5	53.27	0.158106	-0.416611	-0.0408002
YQS-3	Jiaohe	Yu et al. (2009)	811.863	770	876	761	867	748	89.99	19.47	0.151035	-0.806976	-0.370633
YQS-4	Jiaohe	Yu et al. (2009)	839.119	740	841	711	868	697	90.9	28.09	0.133797	-1.01857	-0.566843
YQS-5	Jiaohe	Yu et al. (2009)	799.353	714	841	703	865	690	90.32	23.49	0.211939	0.0252015	0.441213
YQS-6	Jiaohe	Yu et al. (2009)	816.188	734	847	707	887	687	91.01	22.92	0.164197	-0.730186	-0.231856
YQS-7	Jiaohe	Yu et al. (2009)	821.988	804	859	741	883	724	89.34	12.91	0.134587	-1.21773	-0.751085
YQS-8	Jiaohe	Yu et al. (2009)	901.815	880	926	845	924	837	90.45	33.62	0.173829	-0.660046	-0.326325
YQS-9	Jiaohe	Yu et al. (2009)	849.877	898	918	829	906	813	89.73	10.23	0.137029	-1.20474	-0.676748
YQS-10	Jiaohe	Yu et al. (2009)	864.604	842	896	821	877	817	90.66	35.62	0.162707	-0.775337	-0.508083
YQS-11	Jiaohe	Yu et al. (2009)	873.467	844	893	802	890	792	91	31.43	0.161108	-0.992286	-0.693465
YQS-12	Jiaohe	Yu et al. (2009)	997.913	1016	1023	985	960	984	90.56	28.73	0.203078	-0.612977	-0.366772
YQS-14	Jiaohe	Yu et al. (2009)	877.07	836	897	821	916	813	91.01	37.45	0.157519	-0.915939	-0.518191
YQS-15	Jiaohe	Yu et al. (2009)	888.987	909	913	827	892	818	90.67	39.29	0.18877	-0.496649	-0.291204
YQS-16	Jiaohe	Yu et al. (2009)	887.936	921	942	872	935	865	90.45	28.71	0.154225	-1.0919	-0.763433
DSH009	Jiaohe	Hao et al. (2016)	867.846	876	903	807	925	782	89.25	8.92	0.0713957	-2.36245	-1.94835
DSH0012	Jiaohe	Hao et al. (2016)	887.535	974	935	923	905	914	90.09	10.77	0.0837278	-2.12552	-1.70705
DSH0014	Jiaohe	Hao et al. (2016)	867.009	958	925	910	938	898	90.08	11.75	0.0942196	-1.84755	-1.44041
DSH0017	Jiaohe	Hao et al. (2016)	922.782	860	925	827	926	812	90.16	32.67	0.11578	-1.45953	-1.13737
17JH4	Jiaohe	Guo et al. (2020)	938.71	998.847	966.287	932.792	932.383	914.386	89.1357	8.72008	0.331476	-0.285022	0.179959
17JH5	Jiaohe	Guo et al. (2020)	886.207	929.812	930.35	888.559	942.407	884.165	91.3235	34.3154	0.217551	-0.667195	-0.286616
17JH14	Jiaohe	Guo et al. (2020)							91.9412	57.158	0.270042
17JH18	Jiaohe	Guo et al. (2020)	823.011	862.122	879.774	806.744	935.176	788.048	90.6707	14.4094	0.342155	0.0786483	0.681831
17JH21	Jiaohe	Guo et al. (2020)	907.597	968.053	941.234	917.066	952.477	906.236	90.3664	16.9639	0.279322	-0.499838	-0.0505074
17JH24	Jiaohe	Guo et al. (2020)	940.66	986.186	965.731	925.087	965.172	907.843	91.0765	25.0298	0.351696	-0.0685706	0.411921
WQ91-1	Wangqing	Xu et al. (1998)	1150.32	893.938	902.074	852.289	1087.3	804.425	89.78	10.73	0.110826	-1.9782	-1.5848
WQ91-37	Wangqing	Xu et al. (1998)	1249.26	906.88	900.786	853.984	1020.6	806.193	89.32	9.76	0.19228	-1.2362	-1.0445
WQ91-6	Wangqing	Xu et al. (1998)	900.442	943.092	925.774	880.813	1022.74	846.204	89.25	8.28	0.129741	-1.48914	-0.996966
WQ91-11	Wangqing	Xu et al. (1998)	939.067	731.915	831.779	711.548	1051.11	673.052	90.87	16.89	0.114889	-1.59802	-1.17888
WQ91-77	Wangqing	Xu et al. (1998)	894.939	941.706	923.887	869.229	969.053	858.622	90.98	22.12	0.0393668	-3.38497	-2.99282
WQ91-5	Wangqing	Xu et al. (1998)	977.645	1023.5	1013.68	976.06	923.901	987.586	91.25	52.46	0.240844	-0.0783408	0.246251
WQ91-13	Wangqing	Xu et al. (1998)	933.499	813.746	861.46	781.472	959.821	767.648	90.7	46.06
WQ91-20	Wangqing	Xu et al. (1998)	887.365	868.359	893.246	827.238	932.658	811.508	90.4	20.36	0.0213263	-4.51893	-4.09185
WQ91-21	Wangqing	Xu et al. (1998)	858.049	842.468	870.242	824.496	887.833	812.87	90.18	19.35	0.125491	-1.40907	-0.952838
WQ91-22	Wangqing	Xu et al. (1998)	900.979	978.797	946.967	889.063	872.085	894.492	90.79	41.71	0.114691	-1.29423	-0.930146
WQ5	Wangqing	Song et al. (2013)	867.983	770.241	930.05	769.494	912.205	694.53	89.66
WQ9	Wangqing	Song et al. (2013)							89.67	22.4	0.149292
WQ10	Wangqing	Song et al. (2013)	807.841	798.503	855.56	740.436	875.808	717.86	88.8	13.2	0.166332	-0.988305	-0.522438
WQ13	Wangqing	Song et al. (2013)	842.036	817.503	899.43	756.274	898.178	730.779	89.64	13.22	0.219314	-0.56106	-0.107525
WQ15	Wangqing	Song et al. (2013)	824.828	643.718	879.573	602.397	949.3	563.964	90.09
WQ16	Wangqing	Song et al. (2013)	842.684	860.179	939.329	814.367	905.942	791.843	89.46	9.8	0.248983	-0.241437	0.0292093
PFS5	Wangqing	Wang et al. (2013)	882.661	865.31	952.018	845.296	843.796	837.892	90.38	12.89	0.157056	-0.534126	-0.127441
PFS10	Wangqing	Wang et al. (2013)	807.841	814.942	867.55	751.974	875.685	734.998	88.8	13.2	0.166332	-0.988305	-0.523648
PFS13	Wangqing	Wang et al. (2013)	842.036	851.327	867.395	782.13	898.007	763.208	89.51	13.22	0.219314	-0.585583	-0.165597
PFS15	Wangqing	Wang et al. (2013)	813.896	889.351	929.174	832.415	866.298	820.815	90.9	11.92	0.115241	-1.47498	-0.77528
PFS16	Wangqing	Wang et al. (2013)	842.684	861.813	936.805	815.946	905.803	795.752	89.38	9.8	0.173398	-1.15182	-0.852572
WQ39	Wangqing	Hao et al. (2016)	891.4	843.641	855.972	811.634	932.661	803.427	89.89	34.89	0.0697322	-2.28285	-1.96154
WQ62	Wangqing	Hao et al. (2016)	851.916	868.494	889.196	862.086	911.995	848.953	90.59	13.03	0.086758	-2.1513	-1.60655
WQ72	Wangqing	Hao et al. (2016)	858.304	930.216	903.203	864.643	906.344	849.529	89.32	9.68	0.045667	-3.12807	-2.63292
WQ-004	Wangqing	Hao et al. (2016)	842.083	828.525	912.584	801.895	903.722	781.781	89.38	9.75	0.20685	-0.566767	0.0310658
WQ-005	Wangqing	Hao et al. (2016)	773.254	887.591	952.672	836.748	864.75	829.363	89.9	10.99	0.158367	-0.799386	-0.166395
WQ-006	Wangqing	Hao et al. (2016)	794.398	842.384	925.4	807.317	892.133	791.68	89.31	10.44	0.145919	-1.23745	-0.626179
WQ-101	Wangqing	Hao et al. (2016)	914.05	851.889	941.69	817.277	894.402	796.989	89.39	10.07	0.169705	-1.16145	-0.683882
northeastern NCC
CBH1	Changbaishan	Liu (2014)	904.885	975.418	989.482	920.547	946.504	904.307	89.59	10.21	0.170396	-0.827402	-0.456247
CBH2	Changbaishan	Liu (2014)	979.508	916.446	941.864	840.747	951.164	816.067	88.99	9.56	0.134754	-1.3643	-1.20691
CBH3	Changbaishan	Liu (2014)	934.935	978.483	983.415	916.641	937.567	895.997	89.76	13.02	0.11552	-1.63166	-1.24016
CBH4	Changbaishan	Liu (2014)	991.275	1044.8	1014.64	977.525	962.333	956.291	88.57	8.5	0.227416	-0.595735	-0.335225
CBH5	Changbaishan	Liu (2014)	890.435	928.321	934.784	877.804	915.906	867.789	90.22	23.4	0.165197	-0.859993	-0.477996
CBH6	Changbaishan	Liu (2014)	973.561	1056.28	1057.34	1023.46	969.878	1018.47	90.01	18.39	0.219682	-0.463492	-0.110035
CBH7	Changbaishan	Liu (2014)	957.601	999.61	1003.55	969.787	988.494	955.905	90.01	14.26	0.130734	-1.27934	-0.923845
CBH8	Changbaishan	Liu (2014)	856.88	884.872	922.112	822.255	894.852	805.021	89.88	10.87	0.151821	-1.06695	-0.574175
BDX-01	Changbaishan	Par et al. (2017)	945.908	968.571	965.521	914.281	960.193	889.263	90.06	12.75	0.176565	-0.858619	-0.428394
BDX-02	Changbaishan	Par et al. (2017)	860.091	852.857	877.532	788.479	916.844	760.341	89.42	8.94	0.102425	-1.51188	-0.94036
BDX-03	Changbaishan	Par et al. (2017)	874.984	720.55	812.662	665.141	893.729	634.182	89.48	8.82	0.110617	-1.33529	-0.798813
BDX-04	Changbaishan	Par et al. (2017)	869.676	926.992	930.288	860.267	909.639	840.994	89.42	8.92	0.135665	-1.06494	-0.505589
BDX-05	Changbaishan	Par et al. (2017)	845.164	792.387	885.785	783.126	942.152	761.139	89.81	14.27	0.189756	-0.203381	0.223794
BDX-06	Changbaishan	Par et al. (2017)	868.933	833.544	872.728	765.074	922.713	741.721	90.36	12.75	0.156536	-0.880532	-0.389077
BDX-07	Changbaishan	Par et al. (2017)	843.064	779.408	838.305	733.356	908.657	703.98	89.49	10.86	0.150144	-0.902257	-0.376272
BDX-08	Changbaishan	Par et al. (2017)	836.93	824.645	882.172	805.511	928.251	783.554	89.63	14.44	0.205805	-0.0872257	0.306268
BDX-09	Changbaishan	Par et al. (2017)	820.863	766.663	829.246	721.725	912.882	695.866	89.9	14.09	0.182392	-0.440372	0.0502124
BDX-13	Changbaishan	Par et al. (2017)	870.742	796.234	850.273	740.395	958.032	705.416	90.29	13.29	0.131162	-1.22332	-0.709658
BDX-14-1	Changbaishan	Par et al. (2017)	961.249	949.751	963.414	916.871	952.563	896.675	90.19	15.53	0.223775	-0.354629	0.0479502
BDX-14-2	Changbaishan	Par et al. (2017)	1023.79	996.201	1016.14	988.776	939.582	997.517	90.97	54.7	0.204644	-0.323854	-0.0983688
BDX-15-1	Changbaishan	Par et al. (2017)	1004.08	987.62	990.338	961.222	985.52	959.228	90.89	46.61	0.228561	-0.21967	0.0455451
BDX-15-2	Changbaishan	Par et al. (2017)	855.282	860.697	871.036	785.917	948.242	762.54	90.19	16.62	0.135105	-1.01231	-0.524234
BDX-16-1	Changbaishan	Par et al. (2017)	961.854	968.041	960.962	912.591	949.933	885.313	89.62	10.03	0.191941	-0.559153	-0.142015
BDX-16-2	Changbaishan	Par et al. (2017)	862.527	747.852	826.823	695.806	916.961	663.952	89.29	9.73	0.164428	-0.664207	-0.133025
CBS01	Changbaishan	Xu et al. (2019)	865.189	959.764	948.09	897.87	931.414	885.447	91.31	13.08	0.128787	-1.35439	-0.495474
CBS02	Changbaishan	Xu et al. (2019)	852.299	995.689	999.801	960.794	950.661	952.61	90.53	14.59	0.199018	-0.377454	0.0863971
CBS03	Changbaishan	Xu et al. (2019)	904.074	1000.06	1000.31	925.685	973.982	909.361	90.24	14.97	0.202618	-0.661442	-0.198546
CBS04	Changbaishan	Xu et al. (2019)	845.261	922.419	933.122	879.651	964.757	863.309	91.35	14.42	0.174619	-0.432174	0.352517
CBS05	Changbaishan	Xu et al. (2019)	852.342	958.293	962.548	914.729	926.101	907.616	90.67	14.48	0.198299	-0.399939	0.116703
CBS06	Changbaishan	Xu et al. (2019)	868.911	897.864	943.543	881.174	972.177	860.595	89.9	10.91	0.21224	-0.27728	0.245375
CBS07	Changbaishan	Xu et al. (2019)	818.95	895.377	930.993	876.406	956.557	856.065	90	11.22	0.187913	-0.318604	0.278852
CBS08	Changbaishan	Xu et al. (2019)	833.201	1071.35	1054.98	1027.76	925.141	1032.93	89.86	10.63	0.203557	-0.258159	0.283053
CBS09	Changbaishan	Xu et al. (2019)	826.26	1117.95	1037.1	1056.44	936.591	1065.12	90.11	11.13	0.194186	-0.278404	0.310108
CBS10	Changbaishan	Xu et al. (2019)	862.874	1025.6	1026.88	983.085	919.338	979.483	90.18	11.17	0.17541	-0.425808	0.153455
CBS11	Changbaishan	Xu et al. (2019)	850.485	881.599	902.566	840.726	898.444	821.621	89.81	8.76	0.177468	-0.627332	0.0024316
CBS12	Changbaishan	Xu et al. (2019)	878.891	937.806	932.014	875.166	940.718	856.302	90.81	14.64	0.23207	-0.21127	0.312987
TC01	Changbaishan	Xu et al. (2020)	907.343	985.534	940.086	926.639	878.838	931.065	90.3371	16.3282	0.167136	-0.743965	-0.335023
TC02	Changbaishan	Xu et al. (2020)	845.648	978.999	937.862	930.872	889.255	930.913	90.3371	11.4331	0.145979	-0.780702	-0.264612
TC03	Changbaishan	Xu et al. (2020)	870.232	1006.86	948.314	943.224	924.078	942.216	90.3371	15.3702	0.189443	-0.422572	0.0343265
TC04	Changbaishan	Xu et al. (2020)	982.857	1083.27	1030.91	1049.09	995.692	1056.74	90.3371	33.1909	0.18899	-0.569791	-0.33809
TC05	Changbaishan	Xu et al. (2020)	824.522	1020.37	989.858	1003.28	909.147	1004.73	90.3371	8.92536	0.143546	-0.715174	-0.138515
TC06	Changbaishan	Xu et al. (2020)	786.929	1031.8	998.837	1004.96	892.196	1009.86	90.3371	9.04839	0.156027	-0.523247	0.0928968
TC07	Changbaishan	Xu et al. (2020)	850.906	1055.2	994.616	1011.8	885.236	1017.4	90.3371	9.12549	0.15235	-0.776362	-0.281756
TC08	Changbaishan	Xu et al. (2020)	854.42	1015.92	952.463	950.499	921.044	949.424	90.3371	15.1354	0.182821	-0.469822	-0.0531039
SJXO-1	Huinan	Xu et al. (2003)	1019.61	781.263	925.036	747.566	868.714	721.829		10.51	0.450695
SJXO-2	Huinan	Xu et al. (2003)	1015.31	1080.16	1168.75	1031.63	973.883	1027.75	90.45	18.43	0.255645	-0.279551	0.160655
SJXO-3	Huinan	Xu et al. (2003)	809.965	601.769	825.166	568.854	783.793	551.902	91.64	21.04	0.271606	0.247914	1.05831
SJXO-4	Huinan	Xu et al. (2003)	797.382	333.061	780.575	320.077	917.97	274.593	89.57	10.53	0.116732	-1.3886	-0.694819
SJXO-6	Huinan	Xu et al. (2003)	1077.58	1058.35	1141.39	1042.76	995.495	1015.76	88	16.35	0.448125	0.81615	0.881377
SJXO-8	Huinan	Xu et al. (2003)	879.834	1066.32	1122.53	1013.86	805.117	1040.82	90.06	19.55	0.343469	0.243592	0.648653
DLW-9	Huinan	Xu et al. (2003)	896.057	754.215	949.688	731.82	969.346	693.043	90.06	10.93	0.176411	-0.800558	-0.231657
DYS-12	Huinan	Xu et al. (2003)	875.008	760.09	976.836	727.027	892.596	701.369	91.08	11.17	0.296307	0.175416	1.07748
DYS-5	Huinan	Xu et al. (2003)	802.062	258.538	781.746	243.207	847.965	213.915	89.85	9.72	0.46069	0.770921	1.56897
DYS-9	Huinan	Xu et al. (2003)	983.191	836.661	1015.84	807.638	923.736	781.959	89.1	20.56	0.237837	-0.155856	0.318933
DLW-3	Huinan	Xu et al. (2003)	1029.74	1158.59	1171.45	1095.4	861.04	1126.27	90.59	31.03	0.373248	0.446584	1.0185
DLW-4	Huinan	Xu et al. (2003)	867.605	780.865	946.354	736.924	802.455	734.926	90.59	29.37	0.341052	0.0157866	0.463171
DLW-5	Huinan	Xu et al. (2003)	869.188	1004.19	1041.35	927.542	868.236	922.996	91.42	34.34	0.397837	0.335063	1.01959
DLW-6	Huinan	Xu et al. (2003)	837.6	598.118	909.637	587.424	796.971	574.524	91.25	40.85	0.302007	0.484255	1.03121
DLW-7	Huinan	Xu et al. (2003)	815.043	651.745	894.513	620.585	819.236	605.661	90.91	25.01	0.276463	-0.0595285	0.564179
DLW-8	Huinan	Xu et al. (2003)	997.133	855.228	986.727	792.188	906.849	773.623	90.94	47.52	0.215144	-0.189993	-0.0243039
DYS-1	Huinan	Xu et al. (2003)	911.375	925.721	1007.84	857.028	876.672	864.754	90.73	37.53	0.314106	0.194217	0.550963
DYS-2	Huinan	Xu et al. (2003)	1023.31	866.819	972.953	796.689	895.912	786.443	91.12	35.27	0.368335	0.487288	0.771237
DYS-3	Huinan	Xu et al. (2003)	932.111	826.048	1012.01	776.57	847.742	774.47	91.49	40.14	0.311446	0.275185	0.69497
DYS-4	Huinan	Xu et al. (2003)	951.657	828.208	932.508	789.63	898.465	766.81	90.87	21.95
DYS-6	Huinan	Xu et al. (2003)							90.74	43.34	0.121283
DYS-7	Huinan	Xu et al. (2003)	910.196	1046.76	1106.17	967.887	864.307	976.742	91.54	38.72	0.349532	0.42874	0.840959
DYS-8	Huinan	Xu et al. (2003)	983.127	1055.87	1082.92	980.946	872.535	1001.42	90.69	41.93	0.168233	-0.883855	-0.644891
DYS-21	Huinan	Xu et al. (2003)	1057.73	1024.87	1089.3	953.375	920.014	957.264	91.5	38.88	0.29609	0.0586874	0.552003
06JY02	Huinan	Tang et al. (2012)	1011.88	956.911	996.37	918.296	976.639	885.594	90.29	13.45	0.283251	-0.108667	0.335229
06JY06	Huinan	Tang et al. (2012)	1003.34	919.05	966.044	889.91	980.784	871.436	89.74	22.79	0.287658	0.064948	0.365147
06JY30	Huinan	Tang et al. (2012)	1039.01	880.829	952.216	847.65	962.936	812.277	89.97	11.07	0.332607	0.225303	0.624705
06JY31	Huinan	Tang et al. (2012)	1033.39	923.155	949.075	889.647	1006.2	869.883	90.6	28.92	0.289362	0.133542	0.447506
06JY34	Huinan	Tang et al. (2012)	947.011	929.434	950.212	863.417	979.052	849.572	91.6	34.44	0.250069	-0.172548	0.138981
DLW1	Huinan	Wang et al. (2013)	975.36	1114.35	1103.82	1055.47	967.938	1075.89	90.43	35.5	0.21466	-0.503925	-0.430608
DLW3	Huinan	Wang et al. (2013)	927.512	909.249	937.895	855.333	967.122	833.516	89.34	9.99	0.231471	-0.462538	-0.07624
DLW5	Huinan	Wang et al. (2013)	908.95	1003.04	1008.66	953.398	902.671	948.202	89.45	14.21	0.211407	-0.495258	-0.194457
DLW6	Huinan	Wang et al. (2013)	855.896	958.195	948.098	895.142	892.566	897.475	90.7	30.07	0.232763	-0.378073	-0.0133824
DLW8	Huinan	Wang et al. (2013)	807.795	818.177	889.548	765.329	853.507	750.913	89.21	10.86	0.227074	-0.444354	0.0812533
DYS1	Huinan	Wang et al. (2013)	916.972	952.67	984.002	895.541	922.257	891.137	90.71	31.05	0.221906	-0.430531	-0.116174
DYS4	Huinan	Wang et al. (2013)	882.813	897.217	955.8	866.969	915.935	846.982	89.09	10.23	0.245595	-0.12074	0.27232
DYS5	Huinan	Wang et al. (2013)	953.915	1015.77	1023.94	956.217	940.685	956.656	90.66	31.67	0.241779	-0.336466	-0.0334124
DYS7	Huinan	Wang et al. (2013)	922.043	935.55	952.991	878.533	918.157	871.736	90.62	32.25	0.260069	-0.216612	0.0399616
DYS9	Huinan	Wang et al. (2013)	862.854	827.172	917.727	769.339	876.504	748.884	89.36	10.31	0.169707	-0.845216	-0.478421
DYS12	Huinan	Wang et al. (2013)	876.684	949.249	959.033	883.333	903.499	881.636	90.56	32.88	0.181969	-0.599837	-0.298225
DYS13	Huinan	Wang et al. (2013)	949.143	1035.71	1034.54	966.963	937.748	967.94	90.68	31.05	0.183889	-0.752049	-0.483307
DYS14	Huinan	Wang et al. (2013)	894.994	876.791	928.857	795.058	906.058	783.563	90.84	30.14	0.201517	-0.459521	-0.124853
LQL1	Huinan	Wang et al. (2013)	1012.45	1055.25	1102.79	1020.07	974.531	1020.37	89.9	27.34	0.206604	-0.591887	-0.411994
LQL3	Huinan	Wang et al. (2013)	846.695	817.493	904.662	758.438	852.328	744.031	89.7	14.88	0.112545	-1.46621	-1.04838
LQL4	Huinan	Wang et al. (2013)	1000.26	1024.86	1032.98	996.788	975.906	987.616	89.66	18.42	0.25855	-0.249721	0.130866
LQL6	Huinan	Wang et al. (2013)	967.391	1024	1061.89	974.617	951.589	958.435	89.68	12.74	0.123099	-1.56242	-1.27532
LQL7	Huinan	Wang et al. (2013)	973.414	951.623	1019.81	908.647	951.425	894.384	88.86	21.68	0.23329	-0.244115	-0.0546497
LQL8	Huinan	Wang et al. (2013)	1015.23	1019.99	1069.63	984.453	958.358	964.791	88.87	10.78	0.302393	-0.0342369	0.273911
HLW1	Huinan	Liu (2014)	1132.1	1165.52	1133.32	1095.47	1067.72	1101.04	90.49	37.07	0.287412	-0.0853685	0.0375806
HLW2	Huinan	Liu (2014)	886.032	1056.26	1031.77	995.435	882.635	1005.23	90.64	36.12	0.260958	-0.235137	0.132433
HLW3	Huinan	Liu (2014)	1105.49	1101.74	1068.69	1031.16	1022.52	1030.75	89.17	9.88	0.212573	-0.770457	-0.887334
HLW4	Huinan	Liu (2014)	1091.11	1130.08	1104.66	1083.58	976.6	1077.36	89.41	14.51	0.251712	-0.39141	-0.150275
HLW5	Huinan	Liu (2014)	867.671	839.533	896.097	803.342	890.537	788.821	89.22	10.15	0.224857	-0.5645	-0.100425
HYZ1	Huinan	Liu (2014)	880.931	1078.64	1038.59	1008.5	974.773	1017.48	90.71	29.25	0.22406	-0.443391	-0.0921
HYZ2	Huinan	Liu (2014)	1023.68	957.714	994.684	931.973	938.36	906.284	89.08	9.97	0.246438	-0.225099	0.0929216
HYZ3	Huinan	Liu (2014)	996.564	1053.87	1051.16	982.293	1011.05	980.878	90.58	31.69	0.28212	-0.19756	0.0777215
HYZ4	Huinan	Liu (2014)	1052.37	1087.28	1063.99	1023.12	951.81	1024.42	90.55	32.51	0.272148	-0.221766	-0.0145926
HYZ5	Huinan	Liu (2014)	892.295	860.705	931.783	813.783	895.151	787.499	89.79	10.27	0.140654	-1.08537	-0.620323
HYZ6	Huinan	Liu (2014)	867.75	965.132	984.389	898.304	916.1	895.449	90.55	33.89	0.158829	-0.795707	-0.504016
HYZ7	Huinan	Liu (2014)	941.096	1087.24	1083.29	1014.2	948.441	1019.78	90.76	30.97	0.213556	-0.498158	-0.258804
HYZ8	Huinan	Liu (2014)	909.637	867.042	911.044	787.76	913.15	772.559	90.65	29.74	0.166308	-0.772591	-0.462367
HQL1	Huinan	Liu (2014)	1052.4	1141.39	1146.14	1100.46	952.713	1108.8	89.79	27.62	0.263592	-0.326034	-0.159539
HQL2	Huinan	Liu (2014)	868.261	1130.79	1114.04	1091.68	869.674	1108.8	89.69	14.78	0.133714	-1.16604	-0.78948
HQL3	Huinan	Liu (2014)	1018.64	1059.57	1101.62	1025.34	977.176	1013.1	89.65	18.75	0.324598	0.0397675	0.375165
HQL4	Huinan	Liu (2014)	994.663	954.772	996.562	913.588	928.831	902.942	88.89	22.04	0.306167	0.109859	0.368306
HQL5	Huinan	Liu (2014)	1106.76	1119.92	1136.36	1078.45	1019.21	1057.28	89.01	10.65	0.309474	-0.101217	0.193771
HNd-065	Huinan	Lin et al. (2019)	914.269	1115.2	1070.69	1051.72	906.913	1082.52	91.1	37.99	0.242409	-0.194235	0.11147
HNd-066	Huinan	Lin et al. (2019)	914.54	971.203	981.353	930.416	935.811	922.373	90.88	23.75	0.217219	-0.402163	-0.0129774
HNd-067	Huinan	Lin et al. (2019)	912.207				903.36		91.47	40.85	0.204329	-0.3811	-0.0943985
HNd-068	Huinan	Lin et al. (2019)	898.256				910.428		91.46	43.18	0.201043	-0.433193	-0.145624
HNd-069	Huinan	Lin et al. (2019)	941.803				899.242		91.34	38.04	0.219629	-0.323044	-0.0268689
HNd-071	Huinan	Lin et al. (2019)	915.651	943.658	961.746	863.727	901.309	859.582	91.33	44.33	0.203445	-0.455634	-0.179311
HNd-074	Huinan	Lin et al. (2019)	960.366	1120.09	1049.65	1057.79	902.759	1083.2	91.35	32.72	0.255039	-0.094735	0.215097
HNd-075	Huinan	Lin et al. (2019)	893.147	999.479	953.152	930.46	920.832	933.891	91.07	26.44	0.180882	-0.692943	-0.301323
HNd-072	Huinan	Lin et al. (2019)	892.966	1025.16	966.695	973.163	926.54	975.896	91	21.32	0.203746	-0.355909	0.166801
HNd-077	Huinan	Lin et al. (2019)	946.999	1034.21	983.744	982.831	943.373	985.855	90.76	27.53	0.217954	-0.415217	-0.103183
HNd-085	Huinan	Lin et al. (2019)	967.913	1154.56	1068.34	1085.92	1006.31	1100.3	90.65	27.27	0.226151	-0.314027	-0.0152115
HNd-087	Huinan	Lin et al. (2019)	948.969	1021.74	999.231	981.606	919.274	983.96	89.99	22.04	0.25716	-0.0906379	0.225989
J001*	Huinan	Lin et al. (2019)	909.036	1016.48	970.645	960.23	885.486	958.482	89.95	12.22	0.25052	-0.125513	0.238576
J079*	Huinan	Lin et al. (2019)	862.956	1020.9	1001.25	978.576	902.668	981.287	89.85	12.96	0.143828	-1.19248	-0.699481
J082*	Huinan	Lin et al. (2019)	873.069	980.309	953.264	938.453	941.07	928.346	89.79	10.88	0.232964	-0.230756	0.187667
J083*	Huinan	Lin et al. (2019)	846.712	925.705	916.449	880.374	909.039	869.176	89.79	16.29	0.186855	-0.505891	-0.123585
J193*	Huinan	Lin et al. (2019)	910.175	1065.83	1006.4	1019.54	907.522	1022.13	89.46	10.22	0.238864	-0.310808	0.110013
J197*	Huinan	Lin et al. (2019)	852.986	1005.82	959.689	957.598	875.843	957.505	89.1	9.48	0.207616	-0.554836	-0.126663
J198*	Huinan	Lin et al. (2019)	919.297	1058.11	1035.57	1025.19	961.93	1017.79	89.16	9.68	0.196741	-0.77202	-0.29422
J206*	Huinan	Lin et al. (2019)	840.816	908.753	934.905	867.655	896.273	862.86	90.85	16.73	0.162881	-0.643654	-0.0997817
J247*	Huinan	Lin et al. (2019)	847.27	963.296	924.792	906.106	923.85	898.45	89.89	14.48	0.229427	-0.297287	0.154282
J294*	Huinan	Lin et al. (2019)	1131.79	866.553	894.564	838.709	962.843	797.586	89.51
J328*	Huinan	Lin et al. (2019)	847.467	980.66	932.468	922.623	907.813	915.827	89.39	11.23	0.189111	-0.670543	-0.210793
J300*	Huinan	Lin et al. (2019)	848.201	1006.88	981.902	975.602	926.478	963.38	88.66	5.22	0.253642	-0.0217369	0.485387
J301*	Huinan	Lin et al. (2019)	877.496	1030.86	1001.98	991.009	876.565	989.267	88.72	5.23	0.196208	-0.393728	0.0700002
J298*	Huinan	Lin et al. (2019)	990.323	1083	1013.01	1029.54	976.197	1038.49	90.73	28.71	0.255279	-0.00581767	0.366111
J230*	Huinan	Lin et al. (2019)	896.954	985.193	973.16	953.875	907.096	954.478	88.25	19.54	0.205632	-0.368711	-0.120689
J297*	Huinan	Lin et al. (2019)	919.725	1008.9	997.547	957.214	882.83	951.479	87.96	8.95	0.24445	-0.171517	0.154769
LG01	Huinan	Xu et al. (2019)	919.576	977.935	989.327	924.838	934.997	914.569	90.84	18.73	0.162283	-0.93	-0.503889
LG02	Huinan	Xu et al. (2019)	936.358	978.897	964.517	927.039	925.766	911.829	89.92	12.75	0.141065	-1.19008	-0.766064
LG03	Huinan	Xu et al. (2019)	980.397	1139.3	1107.13	1104.33	963.291	1104.99	86.94	13.97	0.278857	0.0615414	0.213973
LG04	Huinan	Xu et al. (2019)	1050.95	1076.38	1069.02	1048.26	962.544	1035.91	87.02	12.69	0.277846	0.136721	0.264224
LG05	Huinan	Xu et al. (2019)	985.131	1123.67	1097.38	1086.37	950.032	1083.59	87.27	12.41	0.304124	0.383622	0.579349
LG06	Huinan	Xu et al. (2019)	986.478	1034.41	1025.63	1001.34	937.637	986.529	89.94	10.77	0.289994	-0.0239971	0.356655
LG07	Huinan	Xu et al. (2019)	1002.51	1007.94	1015.24	980.432	961.698	961.356	90.12	10.82	0.264002	-0.0916928	0.339271
LG08	Huinan	Xu et al. (2019)	961.981	1053.31	1010.53	992.592	920.072	983.602	89.71	9.9	0.178899	-0.805279	-0.455363
LG09	Huinan	Xu et al. (2019)	968.175	1020.99	992.364	943.791	958.526	935.812	91.21	31.04	0.240627	-0.126231	0.194396
LG10	Huinan	Xu et al. (2019)	958.727	1014.56	984.201	936.511	1052.37	930.436	91.29	28.52	0.228438	-0.23305	0.147684
LG01	Huinan	Xu et al. (2020)	977.769	1078.89	1035.73	1054.53	964.379	1046.54	89.7252	10.9578	0.22278	-0.316773	0.0995355
LG02	Huinan	Xu et al. (2020)	940.699	1073.5	1003.41	1017.52	936.503	1013.31	89.276	9.83252	0.123563	-1.35625	-0.947515
LG03	Huinan	Xu et al. (2020)	1107.66	1140.5	1100.66	1128.88	989.265	1124.35	85.4642	12.7481	0.260933	-0.1343	-0.064335
LG04	Huinan	Xu et al. (2020)	926.993	1041.87	977.228	992.647	921.909	990.549	89.5766	12.6914	0.119985	-1.39704	-0.995347
LG05	Huinan	Xu et al. (2020)	910.8	1055.85	990.176	1004.91	914.332	1005.1	89.7034	12.759	0.115836	-1.46558	-1.07523
LG06	Huinan	Xu et al. (2020)	923.776	1033.09	975.324	982.249	924.832	978.795	89.6208	12.5553	0.13945	-1.17128	-0.772888
LG07	Huinan	Xu et al. (2020)	1049.74	1144.54	1086.51	1103.15	1009.51	1109.64	90.8837	9.24001	0.164356	-0.443676	-0.136948
LG08	Huinan	Xu et al. (2020)	972.544	1078.23	1016.47	1040.81	957.154	1052.89	91.2737	34.7645	0.217936	-0.333287	-0.0234999
LG09	Huinan	Xu et al. (2020)	911.957	1032.03	980.711	980.71	934.73	981.492	90.6855	18.7842	0.124306	-1.31157	-0.904747
LG11	Huinan	Xu et al. (2020)	937.407	1033.27	990.136	994.992	893.495	995.078	89.1966	10.4606	0.183012	-0.759104	-0.397336
LG12	Huinan	Xu et al. (2020)	840.214	953.657	923.719	900.297	878.333	895.235	89.5089	10.81	0.119846	-1.223	-0.740273
LG13	Huinan	Xu et al. (2020)	856.683	989.184	944.777	945.582	868.342	947.034	88.3421	9.89152	0.119367	-1.45481	-1.07689
HY1-01	Kuandian	Wu et al. (2006)	959.19	981.834	1010.12	946.355	999.807	937.128	91.4	25.58	0.349897	0.0660653	0.518419
HY2-01	Kuandian	Wu et al. (2006)	915.959	947.608	993.801	918.826	934.629	910.908	90.87	21.63	0.265655	-0.179477	0.390101
HY2-02	Kuandian	Wu et al. (2006)	987.839	1005.43	1017.6	950.288	968.875	925.686	90.45	10.46	0.277663	-0.0809512	0.463634
HY2-03	Kuandian	Wu et al. (2006)	826.263	746.59	844.938	686.444	883.304	661.272	90.27	11.79	0.179457	-0.753653	-0.115361
HY2-04	Kuandian	Wu et al. (2006)	908.316	900.81	957.341	870.502	933.122	847.84	89.9	10.7	0.214838	-0.577018	-0.0690411
HY2-05	Kuandian	Wu et al. (2006)	947.074	938.951	982.906	887.965	973.07	878.442	91.53	28.52	0.247268	-0.171687	0.264753
HY2-06	Kuandian	Wu et al. (2006)	777.444	791.685	879.123	738.276	872.091	724.259	90.42	15	0.190943	-0.416336	0.276562
HY2-07	Kuandian	Wu et al. (2006)	1096.29	1161.69	1134.23	1106	1028.94	1090.23	90.03	10.27	0.328255	0.125035	0.560863
HY2-14	Kuandian	Wu et al. (2006)	1010.8	1058.12	1037.1	1006.74	1018.25	997.641	90.72	19.29	0.282311	-0.173677	0.284548
HY2-29	Kuandian	Wu et al. (2006)	948.821	1032.2	1015.58	979.375	980.603	959.235	89.72	9.03	0.317872	-0.0708651	0.498766
DCT1	Kuandian	Wang et al. (2013)	942.181	920.786	978.399	843.882	982.345	822.943	88.79	28.16	0.220371	0.100504	0.336323
DCT2	Kuandian	Wang et al. (2013)	812.719	914.793	966.261	856.129	874.237	853.081	90.66	18.93	0.107534	-1.53617	-0.96062
DCT3	Kuandian	Wang et al. (2013)	831.097	890.271	953.279	840.933	953.846	823.075	90.52	15.65	0.0902019	-1.86599	-1.58214
DCT5	Kuandian	Wang et al. (2013)	1085.78	1131.78	1152.19	1070.51	1037.99	1045.82	90.32	9.82	0.225025	-0.627882	-0.107226
DCT8	Kuandian	Wang et al. (2013)	944.689	964.223	1044.27	906.144	950.467	884.898	90.43	12.33	0.103607	-1.89137	-1.46933
DCT9	Kuandian	Wang et al. (2013)	1098.11	1137.65	1174.94	1076.25	1087.16	1053.72	89.54	15.85	0.221766	-0.779588	-0.599719
HYS1	Kuandian	Wang et al. (2013)	838.302	749.114	920.248	693.421	858.669	667.106	89.48	8.63	0.0815628	-2.12777	-1.66273
HYS4	Kuandian	Wang et al. (2013)	832.929	707.255	906.905	671.426	898.865	638.435	89.06	8.94	0.0605137	-2.44003	-2.01113
HYS2	Kuandian	Wang et al. (2013)	802.933	782.433	932.266	716.685	866.973	697.844	89.7	12.04	0.0865365	-1.9987	-1.5516
HYS7	Kuandian	Wang et al. (2013)	797.991	729.234	906.092	677.633	829.835	655.558	88.87	9.17	0.201191	-0.545368	-0.0911562
HYS13	Kuandian	Wang et al. (2013)	1157.58	1217.53	1268.15	1177.08	1142.79	1153.21	89.51	13.56	0.184703	-0.407629	-0.407335
HYS14	Kuandian	Wang et al. (2013)	872.38	876.539	965.31	826.663	914.842	809.107	90.78	19.52	0.128296	-1.22225	-0.600715
HYS24	Kuandian	Wang et al. (2013)	859.084	738.467	894.04	698.008	921.217	670.04	90.56
HYS26	Kuandian	Wang et al. (2013)	944.507	1018.41	1095.13	1002.84	946.506	991.487	88.2	8.43	0.135955	-1.62789	-1.51172
QYS8	Kuandian	Wang et al. (2013)	944.16	980.078	1031.18	909.461	982.843	894.605	90.94	16.11	0.121041	-0.730328	-0.26628
QYS10	Kuandian	Wang et al. (2013)	857.088	951.99	894.387	865.984	869.032	861.732	89.21	10.3	0.0354031	-3.58537	-3.41736
QYS14	Kuandian	Wang et al. (2013)	938.246	1005.12	1001.54	942.568	955.033	934.213	89.49	14.91	0.0473632	-3.05507	-2.71286
QYS15	Kuandian	Wang et al. (2013)	1006.58	1101.73	1069.26	1046.31	1036.12	1033.91	89.53	16.98	0.126642	-1.49574	-1.179
QYS18	Kuandian	Wang et al. (2013)	1007.82	1040.02	1042.41	1017.55	995.489	1001.49	88.43	13.67	0.159323	-1.28139	-1.02613
KCT1	Kuandian	Liu (2014)	801.334	999.737	1014.8	955.678	860.831	959.59	90.29	19.03	0.0858483	-1.9371	-1.45066
KCT2	Kuandian	Liu (2014)	857.437	819.849	897.019	790.795	979.988	763.75	91.7	15.71	0.256862	-0.0563733	0.666915
KCT3	Kuandian	Liu (2014)	925.553	841.614	939.877	821.695	948.317	801.482	88.95	28.56	0.277164	0.372384	0.648696
KCT4	Kuandian	Liu (2014)	1101.57	1139.85	1156.11	1079.98	1040.03	1052.14	90.61	9.83	0.235077	-0.609935	-0.0320211
KCT5	Kuandian	Liu (2014)	1085.1	958.319	1049.37	925.846	1037.57	872.373	90.64	11.65	0.119754	-1.76956	-1.22925
KCT6	Kuandian	Liu (2014)	1075.23	1244.38	1189.98	1251.22	1039.52	1125.15	88.83	15.91	0.255155	-0.715199	-0.755502
KHY1	Kuandian	Liu (2014)	859.776	1116.78	977.323	1105.24	891.928	882.685	90.68	8.59	0.116165	-1.33638	-0.592557
KHY2	Kuandian	Liu (2014)	777.604	712.628	889.675	658.124	866.743	633.405	89.06	9.13	0.163493	-0.84417	-0.428274
KHY3	Kuandian	Liu (2014)	838.596	779.343	915.963	732.57	906.245	705.175	89.79	16.81	0.201373	-0.698547	-0.374012
KHY4	Kuandian	Liu (2014)	883.767	703.821	882.265	641.165	935.912	613.144	88.87	9.35	0.141987	-1.19303	-1.10272
KHY5	Kuandian	Liu (2014)	1241.88	1186.17	1291.19	1223.04	1024.78	1172.79	87.07	13.34	0.216365	-0.734371	-0.305065
KHY6	Kuandian	Liu (2014)	883.767	901.057	967.487	854.229	935.912	836.905	88.47	11.3	0.179244	-0.691363	-0.766981
KHY7	Kuandian	Liu (2014)	783.78	776.619	887.17	735.144	828.588	720.717	89.89	8.86	0.127075	-1.17189	-0.761758
KHY8	Kuandian	Liu (2014)	940.798	995.685	1022.59	922.222	932.971	900.369	88.96	8.38	0.18467	-0.994015	-0.741178
KQS1	Kuandian	Liu (2014)	971.297	971.783	1032.27	908.344	970.164	891.968	90.37	22.77	0.304959	1.6682	1.56794
KQS2	Kuandian	Liu (2014)	846.251	941.731	934.988	871.803	862.806	866.492	89.04	13.48	0.201055	-0.458046	-0.226543
KQS3	Kuandian	Liu (2014)	958.021	1016.56	1005.25	954.366	948.653	945.357	89.24	15.48	0.246816	-0.5953	-0.304533
KQS4	Kuandian	Liu (2014)	914.344	1072.32	1064.42	1026.92	916.078	1025.29	88.72	13.72	0.196313	-0.849605	-0.725907
KQS5	Kuandian	Liu (2014)	906.046	898.401	957.156	876.262	906.762	861.604	89.53	16.63	0.196335	-0.782993	-0.388808
far-eastern Russia (FEE)
R42-5	Sviyagin	Guo et al. (2017)	910.174	1015.96	965.759	982.378	981.654	966.213	89.5161	10.4879	0.0564469	-2.64169	-2.28108
R42-6	Sviyagin	Guo et al. (2017)	922.01	1017	961.957	970.113	1016.27	963.044	91.2644	27.6997	0.089704	-1.82865	-1.43452
R42-7	Sviyagin	Guo et al. (2017)	906.817	1011.5	957.966	978.516	952.569	965.892	89.5085	10.4436	0.00993818	-5.61607	-5.24649
R42-8	Sviyagin	Guo et al. (2017)	819.011	943.326	899.339	870.554	904.977	858.7	90.2706	10.6156	0.117359	-1.21656	-0.653995
R42-9	Sviyagin	Guo et al. (2017)	947.213	1055.06	976.309	993.528	989.579	975.29	89.8095	10.1285	0.0264122	-4.0487	-3.6888
R42-10	Sviyagin	Guo et al. (2017)	847.263	943.476	901.63	883.38	917.676	869.183	89.7456	8.86782	0.0489838	-2.75076	-2.26565
R42-11	Sviyagin	Guo et al. (2017)	967.308	1024	967.015	983.315	959.087	968.679	89.5707	10.4787	0.0825101	-2.07923	-1.72285
R42-12	Sviyagin	Guo et al. (2017)	925.42	1008.71	957.843	972.648	940.557	961.543	89.5993	10.5967	0.078861	-2.12218	-1.72209
Sv-1	Sviyagin	Ionov et al. (2020)	903.365	920.035	921.897	851.824	970.017	826.462	89.852	10.6293	0.170687	-0.813818	-0.309303
Sv-2	Sviyagin	Ionov et al. (2020)	901.097	926.913	916.686	851.471	969.218	826.946	89.7087	10.0997	0.040299	-3.18561	-2.6694
Sv-4	Sviyagin	Ionov et al. (2020)	908.105	929.588	922.317	864.122	991.403	841.965	90.0653	13.1937	0.158632	-0.930385	-0.446004
Sv-7	Sviyagin	Ionov et al. (2020)	901.983	953.332	937.519	898.36	997.351	882.551	90.362	16.4255	0.142407	-1.09326	-0.654484
Sv-8	Sviyagin	Ionov et al. (2020)	886.505	922.017	912.702	854.21	982.293	831.243	89.9031	12.937	0.108794	-1.50264	-1.02332
Sv-9	Sviyagin	Ionov et al. (2020)	874.808	886.933	900.175	828.357	948.851	800.421	89.3735	8.32463	0.169982	-0.700935	-0.127439
Sv-12	Sviyagin	Ionov et al. (2020)	865.794	855.088	908.517	789.703	943.256	764.327	89.8576	10.1335	0.164749	-0.828343	-0.299265
Sv-13	Sviyagin	Ionov et al. (2020)	847.03	828.453	887.199	778.324	936.526	754.536	89.6492	10.3292	0.139459	-0.89691	-0.345222
Sv-14	Sviyagin	Ionov et al. (2020)	869.455	898.023	896.359	845.687	1014.36	824.779	90.1128	18.5234	0.146384	-0.972716	-0.449376
Sv-15	Sviyagin	Ionov et al. (2020)	839.879	870.796	888.7	811.775	974.372	787.452	89.9514	10.8856	0.159915	-0.802648	-0.261246
Sv-16	Sviyagin	Ionov et al. (2020)	817.527	780.342	880.417	727.755	921.516	700.117	89.2224	9.59202	0.153542	-0.775577	-0.22067
Sv-17	Sviyagin	Ionov et al. (2020)	963.355	981.923	991.037	921.408	1022.82	893.109	90.0759	14.3989	0.148814	-1.16772	-0.719018
Sv-18	Sviyagin	Ionov et al. (2020)	915.674	971.011	955.745	927.235	1035.44	896.786	89.6275	11.909	0.176519	-0.768014	-0.30854
Sv-19	Sviyagin	Ionov et al. (2020)	842.746	903.365	896.416	832.581	955.875	808.682	89.6563	9.96346	0.119	-1.36605	-0.911403
Sv-20	Sviyagin	Ionov et al. (2020)	877.132	903.693	929.298	828.774	1002.01	805.6	90.4038	17.2074	0.113177	-1.46861	-0.984683
Sv-21	Sviyagin	Ionov et al. (2020)	906.164	898.286	910.208	840.658	978.022	815.195	89.8775	9.84078	0.197434	-0.726502	-0.191407
Sv-22	Sviyagin	Ionov et al. (2020)	926.901	915.048	969.578	874.257	953.4	847.387	89.3009	10.3391	0.114695	-1.43009	-1.04726
Sv-24	Sviyagin	Ionov et al. (2020)	983.116	983.732	1008.72	920.787	1017.94	890.304	89.4861	10.352	0.191212	-0.73207	-0.26617
Sv-27	Sviyagin	Ionov et al. (2020)	874.425	757.715	871.06	703.267	927.507	675.193	89.6174	11.7698	0.105147	-1.79274	-1.22714
Sv-28	Sviyagin	Ionov et al. (2020)	905.435	941.125	952.318	870.721	943.141	849.048	89.7096	10.1699	0.128943	-1.31803	-0.81497
Sv-29	Sviyagin	Ionov et al. (2020)	960.033	955.35	977.085	891.315	966.494	863.618	89.3404	9.09674	0.154615	-1.10288	-0.669236
Sv-32	Sviyagin	Ionov et al. (2020)	934.539	1000.26	929.802	943.206	1024.9	932.698	91.0934	25.3558	0.0580371	-2.35495	-2.07253
Sv-36	Sviyagin	Ionov et al. (2020)	976.555	1049.46	987.131	1035.15	1028.72	1024.06	89.6581	14.5696	0.0524024	-2.82416	-2.59436
Pod-1	Podgelban	Ionov et al. (2020)	881.21	1005.9	918.153	939.02	946.531	932.66	89.3689	12.8624
Pod-2	Podgelban	Ionov et al. (2020)	897.389	995.235	916.847	936.855	940.121	924.922	88.9623
Pod-3	Podgelban	Ionov et al. (2020)	982.659	1053.47	1006.56	994.722	987.253	975.053	88.8586	9.46859	0.171149	-0.815471	-0.464342
Pod-4	Podgelban	Ionov et al. (2020)	950.759	1032.47	986.157	963.133	975.261	944.573	88.8912	10.706	0.15772	-0.993321	-0.668364
Pod-5	Podgelban	Ionov et al. (2020)	861.251	997.832	911.332	927.669	920.824	922.359	88.9	11.2104
References
Guo, P., Xu, W. L., Wang, C. G., Wang, F., Ge, W. C., Sorokin, A. A. & Wang, Z. W. (2017). Age and evolution of the lithospheric mantle beneath the Khanka Massif: geochemical and Re–Os isotopic evidence from Sviyagino mantle xenoliths. Lithos 282-283, 326-338.
Guo, P., Ionov, D. A., Xu, W. L., Wang, C. G. & Luan, J. P. (2020). Mantle and recycled oceanic crustal components in mantle xenoliths from northeastern china and their mantle sources. Journal of Geophysical Research: Solid Earth 125.
Ionov, D. A., Guo, P., Nelson, W. R., Shirey, S. B. & Willbold, M. (2020). Paleoproterozoic melt-depleted lithospheric mantle in the Khanka block, far eastern Russia: Inferences for mobile belts bordering the North China and Siberian cratons. Geochimica et Cosmochimica Acta 270, 95-111.
Hao, Y. T., Xia, Q. K., Jia, Z. B., Zhao, Q. C., Li, P., Feng, M. & Liu, S. C. (2016). Regional heterogeneity in the water content of the Cenozoic lithospheric mantle of Eastern China. Journal of Geophysical Research: Solid Earth 121, 517-537.
Lin, A. B., Zheng, J. P., Xiong, Q., Aulbach, S., Lu, J. G., Pan, S. K., Dai, H. K. & Zhang, H. (2019). A refined model for lithosphere evolution beneath the decratonized northeastern North China Craton. Contributions to Mineralogy and Petrology 174, 15.
Liu, J. L. (2014). Comparative study on nature of subcontinental lithosphere mantle in northeastern margin of the North China Craton and Northeast Orogenic Belt. Doctoral thesis. (In Chinese with English abstract)
Pan, S. K., Zheng, J. P., Chu, L. L. & Griffin, W. L. (2013). Coexistence of the moderately refractory and fertile mantle beneath the eastern Central Asian Orogenic Belt. Gondwana Research 23, 176-189.
Pan, S. K., Zheng, J. P., Griffin, W. L., Xu, Y. X. & Li, X. Y. (2015). Nature and evolution of the lithospheric mantle beneath the eastern Central Asian Orogenic Belt: Constraints from peridotite xenoliths in the central part of the Great Xing'an Range, NE China. Lithos 238, 52-63.
Park, K., Choi, S. H., Cho, M. & Lee, D. C. (2017). Evolution of the lithospheric mantle beneath Mt. Baekdu (Changbaishan): Constraints from geochemical and Sr–Nd–Hf isotopic studies on peridotite xenoliths in trachybasalt. Lithos 286, 330-344.
Song, Y., Wang, J., Liu, J. L., Xie, Z. P. & Hattori, K. H. (2013). Mineral chemistry of mantle xenoliths in Cenozoic basalts from Wangqing, eastern Jilin: implications for formation of newly accreted sub-continental mantle earth. Science Frontiers 20, 96-107. (In Chinese with English abstract)
Tang, Y. J., Zhang, H. F., Deloule, E., Su, B. X., Ying, J. F., Xiao, Y. & Hu, Y. (2012). Slab-derived lithium isotopic signatures in mantle xenoliths from northeastern North China Craton. Lithos 149, 79-90.
Tian, G. C., Liu, J. G., Scott, J. M., Chen, L. H., Pearson, D. G., Chu, Z. Y., Wang, Z. C. & Luo Y. (2020). Architecture and evolution of the lithospheric roots beneath circum-cratonic orogenic belts–the Xing’an Mongolia Orogenic Belt and its relationship with adjacent North China and Siberian cratonic roots. Lithos (submitted).
Wang, J., Hattori, K. H. & Xie, Z. P. (2013). Oxidation state of lithospheric mantle along the northeastern margin of the North China Craton: implications for geodynamic processes. International Geology Review 55, 1418-1444.
Wu, F. Y., Walker, R. J., Yang, Y. H., Yuan, H. L. & Yang, J. H. (2006). The chemical-temporal evolution of lithospheric mantle underlying the North China Craton. Geochimica et Cosmochimica Acta 70, 5013-5034.
Xu, Q. H., Liu, J. Q., He, H. Y. & Zhang, Y. H. (2019). Nature and evolution of the lithospheric mantle revealed by water contents and He-Ar isotopes of peridotite xenoliths from Changbaishan and Longgang basalts in Northeast China. Science Bulletin 64, 1325-1335.
Xu, Q. H., Liu, J. Q., Mo, X. X., He, H. Y., Zhang, Y. H. & Zhao, W. B. (2020). Characteristics of the lithospheric mantle revealed by peridotite xenoliths from Changbaishan volcanic rocks. Acta Petrologica Sinica 36, 2047-2066. (In Chinese with English abstract)
Xu, Y. G., Ross, J. V. & Mercier, J. C. C. (1993). The upper mantle beneath the continental rift of Tanlu, Eastern China: evidence for the intra-lithospheric shear zones. Tectonophysics 225, 337-360.
Xu, Y. G., Menzies, M. A., Vroon, P., Mercier, J. C. & Lin, C. Y. (1998). Texture–temperature–geochemistry relationships in the upper mantle as revealed from spinel peridotite xenoliths from Wangqing, NE China. Journal of Petrology 39, 469-493.
Xu, Y. G., Menzies, M. A., Thirlwall, M. F., Huang, X. L., Liu, Y. & Chen, X. M. (2003). “Reactive” harzburgites from Huinan, NE China: products of the lithosphere-asthenosphere interaction during lithospheric thinning? Geochimica et Cosmochimica Acta 67, 487-505.
Yu, S. Y., Xu, Y. G., Huang, X. L., Ma, J. L., Ge, W. C., Zhang, H. H. & Qin, X. F. (2009). Hf–Nd isotopic decoupling in continental mantle lithosphere beneath Northeast China: effects of pervasive mantle metasomatism. Journal of Asian Earth Sciences 35, 554-570.
Zhang, M., Yang, J. H., Sun, J. F., Wu, F. Y. & Zhang, M. (2012). Juvenile subcontinental lithospheric mantle beneath the eastern part of the Central Asian Orogenic Belt. Chemical Geology 328, 109-122.
Zhang, Y. L (2011). Isotopic compositions of the peridotite xenoliths and age of the subcontinental lithospheric mantle in the Great Xing'an Range. Doctoral thesis. (In Chinese with English abstract)
Zhang, Y. L., Liu, C. Z., Ge, W. C., Wu, F. Y. & Chu, Z. Y. (2011). Ancient sub-continental lithospheric mantle (SCLM) beneath the eastern part of the Central Asian Orogenic Belt (CAOB): Implications for crust–mantle decoupling. Lithos 126, 233-247.
Zhang, Y. L., Ge, W. C., Sun, J., Yang, H., Liu, Z. C. & Liu, J. G. (2019). Age and composition of the subcontinental lithospheric mantle beneath the Xing'an–Mongolia Orogenic Belt: Implications for the construction of microcontinents during accretionary orogenesis. Lithos 326, 556-571.
Zhao, Y. W. & Fan, Q. C. (2011). Characteristics of lithospheric mantle beneath the Great Xing'an Range: evidence from spinel peridotite xenoliths in the Halaha River and Chaoer River area. Acta Petrologica Sinica 27, 2833-2841. (In Chinese with English abstract)
Zhou, Q., Wu, F. Y., Chu, Z. Y., Yang, Y. H., Sun, D. Y. & Ge, W. C. (2007). Sr-Nd-Hf-Os isotopic characterizations of the Jiaohe peridotite xenoliths in Jilin province and constraints on the lithospheric mantle age in northeastern China. Acta Petrologica Sinica 23, 1269-1280. (In Chinese with English abstract)
Zhou, Q., Wu, F. Y., Chu, Z. Y. & Ge, W. C. (2010). Isotopic compositions of mantle xenoliths and age of the lithospheric mantle in Yitong, Jilin Province. Acta Petrologica Sinica 26, 1241-1264. (In Chinese with English abstract)
